# Supplementary material
Source: PubMed Central journal article supplement (PMC10507596)
Supplement: jamaneurol-e233240-s001.pdf [file jamaneurol-e233240-s001.pdf]

## Supplementary Online Content

Misra S, Kasner SE, Dawson J, et al. Outcomes in patients with poststroke seizures: a systematic review and meta-analysis. *JAMA Neurol*. Published online September 18, 2023. doi:10.1001/jamaneurol.2023.3240

**eAppendix.** Detailed Search Strategy

**eFigure 1.** The List of Countries Representing the Number of Studies

**eFigure 2.** Funnel Plot to Test the Presence of Publication Bias

**eFigure 3.** Sensitivity Analysis Using the Leave-One-Out Method

**eFigure 4.** Subgroup Analysis Based on Seizure Subtypes

**eFigure 5.** Subgroup Analysis Based on Stroke Subtypes

**eFigure 6.** Subgroup Analysis Based on Seizure and Stroke Subtypes

**eFigure 7.** Subgroup Analysis on Patients With Status Epilepticus

**eFigure 8.** Sensitivity Analysis Using the Leave-One-Out Method

**eFigure 9.** Subgroup Analysis Based on Seizure Subtypes

**eFigure 10.** Subgroup Analysis Based on Stroke Subtypes

**eFigure 11.** Subgroup Analysis Based on Seizure and Stroke Subtypes

**eFigure 12.** Sensitivity Analysis Using the Leave-One-Out Method

**eFigure 13.** Subgroup Analysis Based on Seizure Subtypes

**eFigure 14.** Subgroup Analysis Based on Stroke Subtypes

**eFigure 15.** Association of Poststroke Seizures With Recurrent Stroke

**eTable 1.** Definition of Early and Late Seizures Used by the Studies

**eTable 2.** Baseline Characteristics of Studies

**eTable 3.** Risk Factors Associated With PSS

**eTable 4.** Risk of Bias (Quality) Assessment for the Studies

**eTable 5.** Association of Disability (Mean mRS Score) With Poststroke Seizures

**eTable 6.** Association of Recurrent Stroke and Dementia With Poststroke Seizures

**eTable 7.** Comparison of Our Meta-Analysis With Previously Published Meta-Analyses

**eTable 8.** Future Directions for PSS Studies

**eReferences**

This supplementary material has been provided by the authors to give readers additional information about their work.

**eAppendix 1:** Detailed search strategy  
Ovid MEDLINE(R) ALL

|   |                                                                                                                                                                                                                                                                                                                                                                               |
|---|-------------------------------------------------------------------------------------------------------------------------------------------------------------------------------------------------------------------------------------------------------------------------------------------------------------------------------------------------------------------------------|
| 1 | cerebrovascular disorders/ or basal ganglia cerebrovascular disease/ or exp brain ischemia/ or carotid artery diseases/ or carotid artery thrombosis/ or intracranial arterial diseases/ or cerebral arterial diseases/ or exp "intracranial embolism and thrombosis"/ or exp stroke/                                                                                         |
| 2 | (isch?emi\$ adj6 (stroke\$ or apoplex\$ or cerebral vasc\$ or cerebrovasc\$ or cva or attack\$)).tw,kf.                                                                                                                                                                                                                                                                       |
| 3 | ((brain or cerebr\$ or cerebell\$ or vertebrobasil\$ or hemispher\$ or intracran\$ or intracerebral or infratentorial or supratentorial or middle cerebral artery or MCA\$ or anterior circulation or posterior circulation or basilar artery or vertebral artery or space occupying) adj5 (isch?emi\$ or infarct\$ or thrombo\$ or emboli\$ or occlus\$ or hypoxi\$)).tw,kf. |
| 4 | 1 or 2 or 3                                                                                                                                                                                                                                                                                                                                                                   |
| 5 | ((post* or after or following) adj6 (seizure* or convulsi* or epilep*)).tw,kf.                                                                                                                                                                                                                                                                                                |
| 6 | (exp epilepsy/ or exp seizures/) and ((post* or onset).tw,kf. or (after or following).ti.)                                                                                                                                                                                                                                                                                    |
| 7 | 5 or 6                                                                                                                                                                                                                                                                                                                                                                        |
| 8 | 4 and 7                                                                                                                                                                                                                                                                                                                                                                       |
| 9 | 8 not (animals/ not (animals/ and humans/))                                                                                                                                                                                                                                                                                                                                   |

Embase (Ovid)

|    |                                                                                                                                                                                                                                                                                                  |
|----|--------------------------------------------------------------------------------------------------------------------------------------------------------------------------------------------------------------------------------------------------------------------------------------------------|
| 1  | *cerebrovascular disease/ or *cerebral artery disease/ or *cerebrovascular accident/ or *stroke/ or *vertebrobasilar insufficiency/ or *carotid artery disease/ or exp *carotid artery obstruction/ or exp *brain infarction/ or exp *brain ischemia/ or exp *occlusive cerebrovascular disease/ |
| 2  | (isch?emi\$ adj6 (stroke\$ or apoplex\$ or cerebral vasc\$ or cerebrovasc\$ or cva or attack\$)).tw,kw.                                                                                                                                                                                          |
| 3  | ((brain or cerebr\$ or cerebell\$ or vertebrobasil\$ or hemispher\$ or intracran\$ or intracerebral or infratentorial or supratentorial or middle cerebr\$ or mca\$ or anterior circulation) adj5 (isch?emi\$ or infarct\$ or thrombo\$ or emboli\$ or occlus\$ or hypoxi\$)).tw,kw.             |
| 4  | 1 or 2 or 3                                                                                                                                                                                                                                                                                      |
| 5  | ((post* or after or following) adj6 (seizure* or convulsi* or epilep*)).tw,kw.                                                                                                                                                                                                                   |
| 6  | (exp *epilepsy/ or exp *seizures/) and ((post* or onset).tw,kw. or (after or following).ti.)                                                                                                                                                                                                     |
| 7  | 5 or 6                                                                                                                                                                                                                                                                                           |
| 8  | 4 and 7                                                                                                                                                                                                                                                                                          |
| 9  | 8 not ((exp animal/ or nonhuman/) not exp human/)                                                                                                                                                                                                                                                |
| 10 | limit 9 to conference abstracts                                                                                                                                                                                                                                                                  |
| 11 | 9 not 10                                                                                                                                                                                                                                                                                         |

APA PsycInfo <1806 to February Week 3 2022>

|   |                                                                                                                                    |
|---|------------------------------------------------------------------------------------------------------------------------------------|
| 1 | cerebrovascular disorders/ or cerebral hemorrhage/ or cerebral ischemia/ or cerebrovascular accidents/ or subarachnoid hemorrhage/ |
| 2 | (stroke* or intracerebral h?emorrhage*).tw.                                                                                        |

|    |                                                                                                                                                                                                                                                                                                                                                                |
|----|----------------------------------------------------------------------------------------------------------------------------------------------------------------------------------------------------------------------------------------------------------------------------------------------------------------------------------------------------------------|
| 3  | (isch?emi* adj6 (stroke* or apoplex* or cerebral vasc* or cerebrovasc* or cva or attack*)).tw.                                                                                                                                                                                                                                                                 |
| 4  | ((brain or cerebr* or cerebell* or vertebrobasil* or hemispher* or intracran* or intracerebral or infratentorial or supratentorial or middle cerebral artery or MCA* or anterior circulation or posterior circulation or basilar artery or vertebral artery or space occupying) adj5 (isch?emi* or infarct* or thrombo* or emboli* or occlus* or hypoxi*)).tw. |
| 5  | 1 or 2 or 3 or 4                                                                                                                                                                                                                                                                                                                                               |
| 6  | ((post* or after or following) adj6 (seizure* or convulsi* or epilep*)).tw.                                                                                                                                                                                                                                                                                    |
| 7  | (exp epilepsy/ or exp seizures/) and ((post* or onset).tw. or (after or following).ti.)                                                                                                                                                                                                                                                                        |
| 8  | 6 or 7                                                                                                                                                                                                                                                                                                                                                         |
| 9  | 5 and 8                                                                                                                                                                                                                                                                                                                                                        |
| 10 | 9 not (animal not human).po.                                                                                                                                                                                                                                                                                                                                   |
| 11 | limit 10 to ("0200 book" or "0240 authored book" or "0280 edited book" or "0300 encyclopedia" or "0400 dissertation abstract")                                                                                                                                                                                                                                 |
| 12 | 10 not 11                                                                                                                                                                                                                                                                                                                                                      |

#### Web of Science

|   |                                                                                                                                                                                                                                                                                                                                                                                                                                                                                                                                                                                                                                                                                                                                                                                                                                                                                                                                                                                                                                                                                                                                           |
|---|-------------------------------------------------------------------------------------------------------------------------------------------------------------------------------------------------------------------------------------------------------------------------------------------------------------------------------------------------------------------------------------------------------------------------------------------------------------------------------------------------------------------------------------------------------------------------------------------------------------------------------------------------------------------------------------------------------------------------------------------------------------------------------------------------------------------------------------------------------------------------------------------------------------------------------------------------------------------------------------------------------------------------------------------------------------------------------------------------------------------------------------------|
| 1 | TI=((post* or after or following) NEAR/6 (seizure* or convulsi* or epilep*)) OR AB==((post* or after or following) NEAR/6 (seizure* or convulsi* or epilep*)) OR AK==((post* or after or following) NEAR/6 (seizure* or convulsi* or epilep*))                                                                                                                                                                                                                                                                                                                                                                                                                                                                                                                                                                                                                                                                                                                                                                                                                                                                                            |
| 2 | TI=((brain or cerebr* or cerebell* or vertebrobasil* or hemispher* or intracran* or intracerebral or infratentorial or supratentorial or "middle cerebral artery" or MCA* or "anterior circulation" or "posterior circulation" or "basilar artery" or "vertebral artery" or "space occupying") NEAR/5 (isch?emi* OR infarct* OR thrombo* OR emboli* or occlus* or hypoxi*)) OR AB=((brain or cerebr* or cerebell* or vertebrobasil* or hemispher* or intracran* or intracerebral or infratentorial or supratentorial or "middle cerebral artery" or MCA* or "anterior circulation" or "posterior circulation" or "basilar artery" or "vertebral artery" or "space occupying") NEAR/5 (isch?emi* OR infarct* OR thrombo* OR emboli* or occlus* or hypoxi*)) OR AK=((brain or cerebr* or cerebell* or vertebrobasil* or hemispher* or intracran* or intracerebral or infratentorial or supratentorial or "middle cerebral artery" or MCA* or "anterior circulation" or "posterior circulation" or "basilar artery" or "vertebral artery" or "space occupying") NEAR/5 (isch?emi* OR infarct* OR thrombo* OR emboli* or occlus* or hypoxi*)) |
| 3 | TI=(stroke* or "intracerebral h?emorrhage*") OR AB=(stroke* or "intracerebral h?emorrhage*") OR AK=(stroke* or "intracerebral h?emorrhage*")                                                                                                                                                                                                                                                                                                                                                                                                                                                                                                                                                                                                                                                                                                                                                                                                                                                                                                                                                                                              |
| 4 | TI=(isch?emi* NEAR/6 (stroke* or apoplex* or "cerebral vasc*" or cerebrovasc* or cva or attack*)) OR AB=(isch?emi* NEAR/6 (stroke* or apoplex* or "cerebral vasc*" or cerebrovasc* or cva or attack*)) OR AK=(isch?emi* NEAR/6 (stroke* or apoplex* or "cerebral vasc*" or cerebrovasc* or cva or attack*))                                                                                                                                                                                                                                                                                                                                                                                                                                                                                                                                                                                                                                                                                                                                                                                                                               |
| 5 | #2 OR #3 OR #4                                                                                                                                                                                                                                                                                                                                                                                                                                                                                                                                                                                                                                                                                                                                                                                                                                                                                                                                                                                                                                                                                                                            |
| 6 | #1 and #5                                                                                                                                                                                                                                                                                                                                                                                                                                                                                                                                                                                                                                                                                                                                                                                                                                                                                                                                                                                                                                                                                                                                 |
| 7 | #1 AND #5 and Meeting Abstracts (Exclude – Document Types)                                                                                                                                                                                                                                                                                                                                                                                                                                                                                                                                                                                                                                                                                                                                                                                                                                                                                                                                                                                                                                                                                |

#### Cochrane

|    |                                                                                                                                                                                                                                                                                                                                                                                                                                                                                                                                                                                                                                |
|----|--------------------------------------------------------------------------------------------------------------------------------------------------------------------------------------------------------------------------------------------------------------------------------------------------------------------------------------------------------------------------------------------------------------------------------------------------------------------------------------------------------------------------------------------------------------------------------------------------------------------------------|
| #1 | ((post* or after or following) NEAR/6 (seizure* or convulsi* or epilep*)):ti,ab,kw                                                                                                                                                                                                                                                                                                                                                                                                                                                                                                                                             |
| #2 | [mh ^"cerebrovascular disorders"] or [mh ^"basal ganglia cerebrovascular disease"] or [mh "brain ischemia"] or [mh ^"carotid artery diseases"] or [mh ^"carotid artery thrombosis"] or [mh ^"carotid artery, internal, dissection"] or [mh ^"stroke, lacunar"] or [mh ^"intracranial arterial diseases"] or [mh ^"cerebral arterial diseases"] or [mh ^"infarction, anterior cerebral artery"] or [mh ^"infarction, middle cerebral artery"] or [mh ^"infarction, posterior cerebral artery"] or [mh "intracranial embolism and thrombosis"] or [mh ^stroke] or [mh "brain infarction"] or [mh ^"vertebral artery dissection"] |
| #3 | ((brain or cerebr* or cerebell* or vertebrobasil* or hemispher* or intracran* or intracerebral or infratentorial or supratentorial or middle cerebr* or mca* or anterior circulation) near/5 (isch*emi* or infarct* or thrombo* or emboli* or occlus* or hypoxi*)):ti,ab,kw                                                                                                                                                                                                                                                                                                                                                    |
| #4 | (isch*emi* near/6 (stroke* or apoplex* or cerebral vasc* or cerebrovasc* or cva or attack*)):ti,ab,kw                                                                                                                                                                                                                                                                                                                                                                                                                                                                                                                          |
| #5 | #2 or #3 or #4                                                                                                                                                                                                                                                                                                                                                                                                                                                                                                                                                                                                                 |
| #6 | #1 and #5                                                                                                                                                                                                                                                                                                                                                                                                                                                                                                                                                                                                                      |
|    | <a href="#">Cochrane Database of Systematic Reviews</a><br>Issue 3 of 12, March 2022                                                                                                                                                                                                                                                                                                                                                                                                                                                                                                                                           |
|    | <a href="#">Cochrane Central Register of Controlled Trials</a><br>Issue 2 of 12, February 2022                                                                                                                                                                                                                                                                                                                                                                                                                                                                                                                                 |

Sum of No. of studies by Country

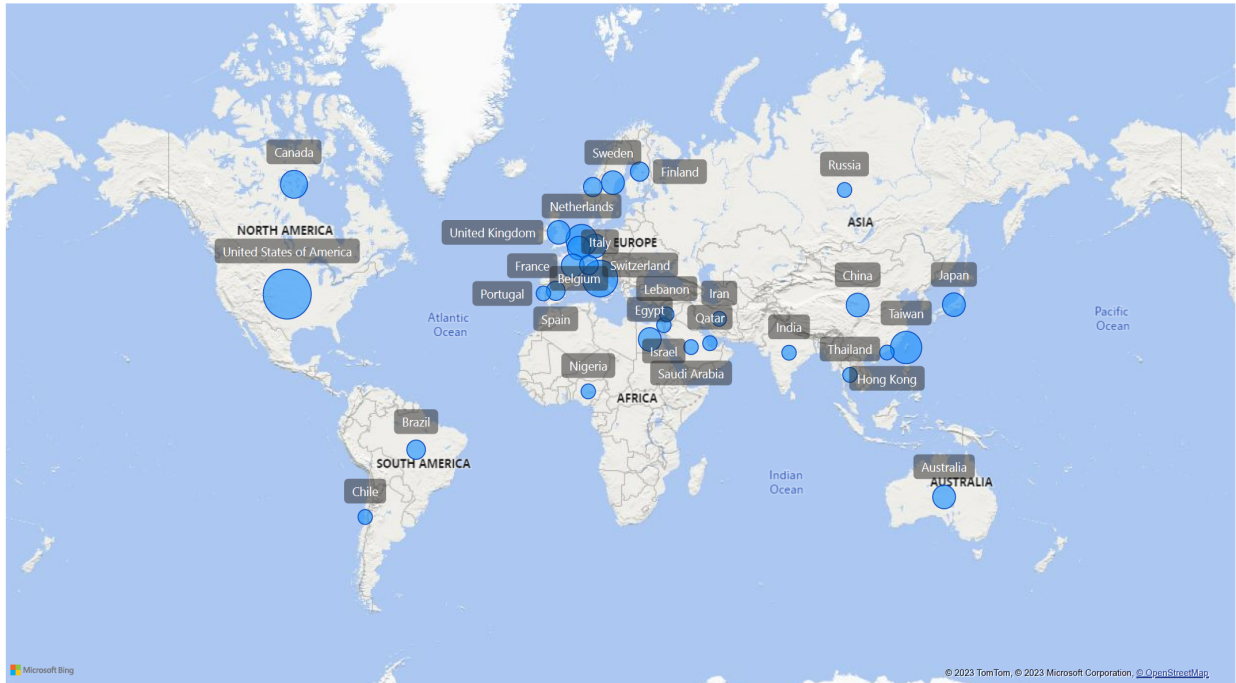

**eFigure 1:** The list of countries representing the number of studies included in our systematic review and meta-analysis.

Our systematic review included 9 studies from United States of America, five each from Italy, Netherlands, and Taiwan, three each from Belgium, Canada, Egypt, France, Germany, and Sweden, two each from China, Brazil, Finland, Japan, Norway, Spain, Switzerland, and United Kingdom, and, one each from Australia, Hong Kong, India, Iran, Lebanon, Nigeria, Portugal, Qatar, Russia, Saudi Arabia, and Thailand, and one multicentric study from Australia, Canada, Israel, and Italy, and one from Australia, Chile, China, Japan, and UK.

**(a) Mortality**

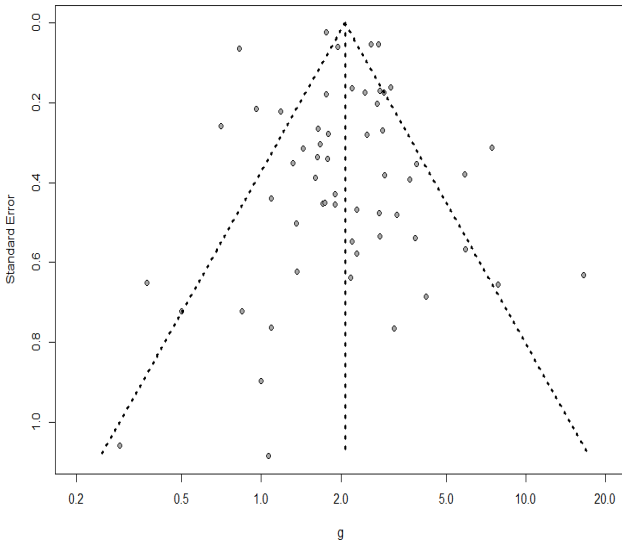

**P-value: 0.40**

**(b) Poor outcome**

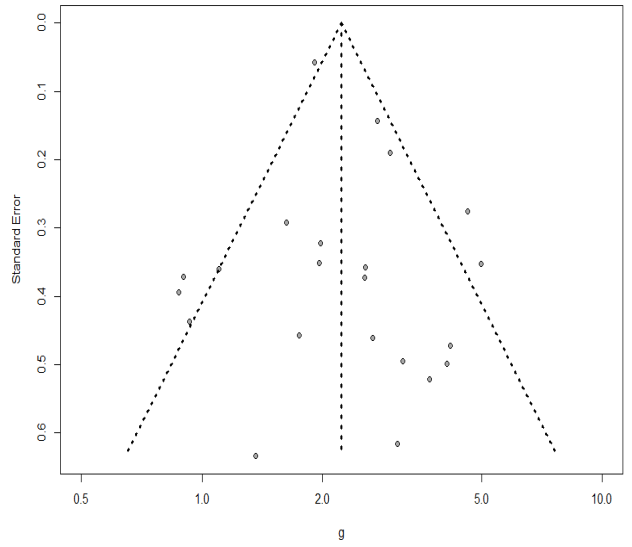

**P-value: 0.43**

**(c) Disability**

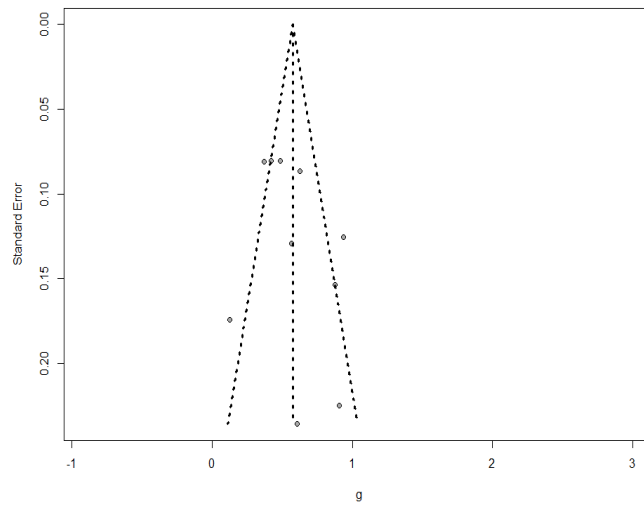

**P-value: 0.27**

**eFigure 2:** Funnel plot to test the presence of publication bias for the association of PSS with various outcome measures.

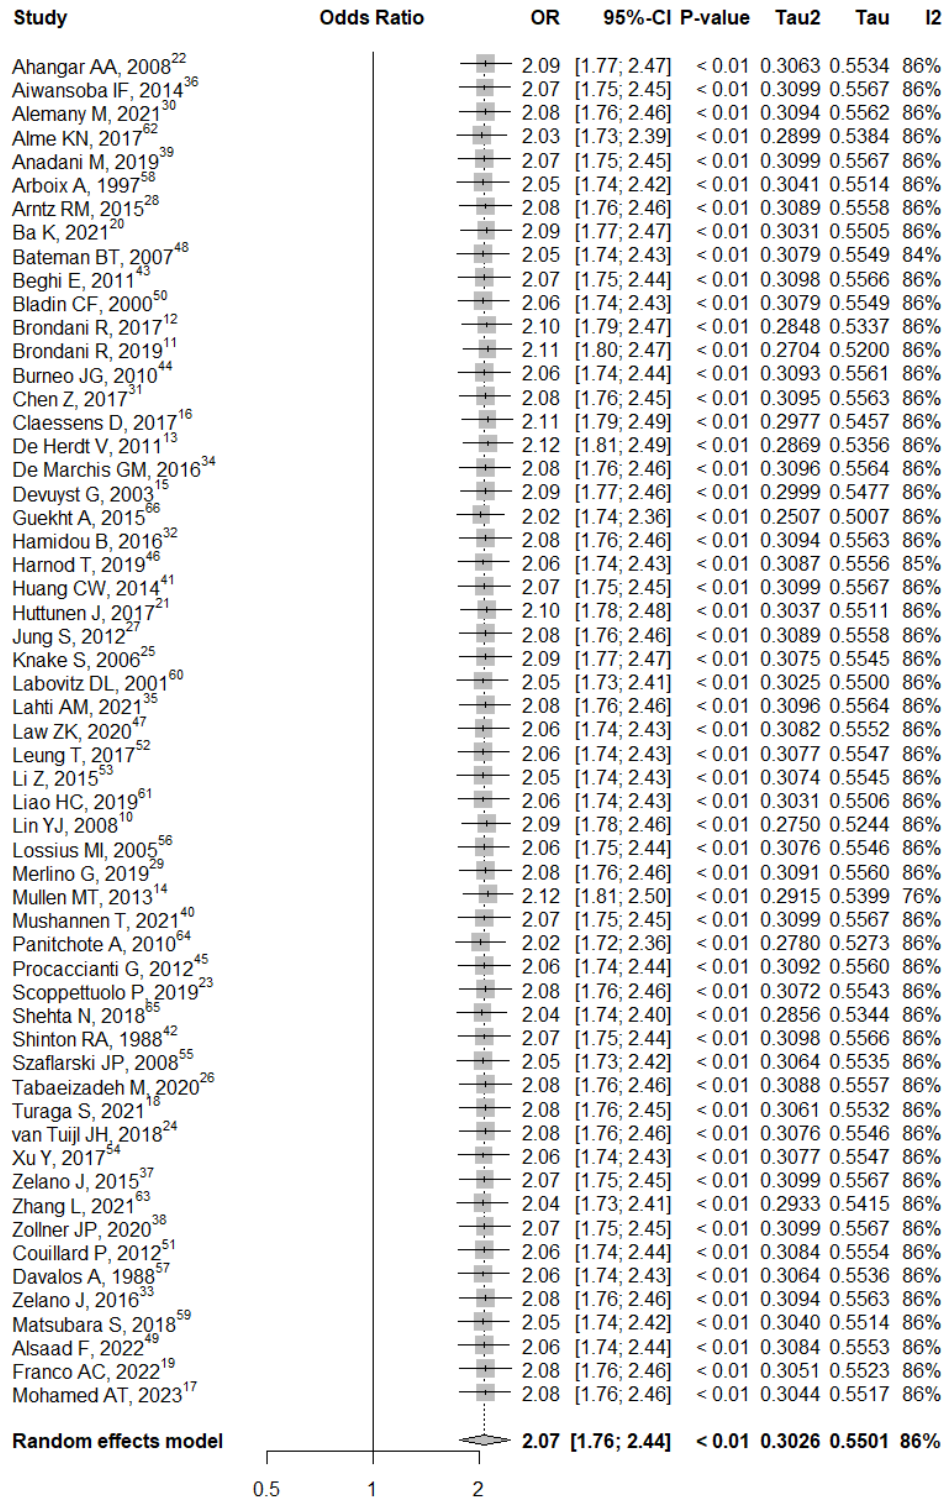

**eFigure 3:** Sensitivity analysis using the leave-one-out method for the association of PSS with mortality.



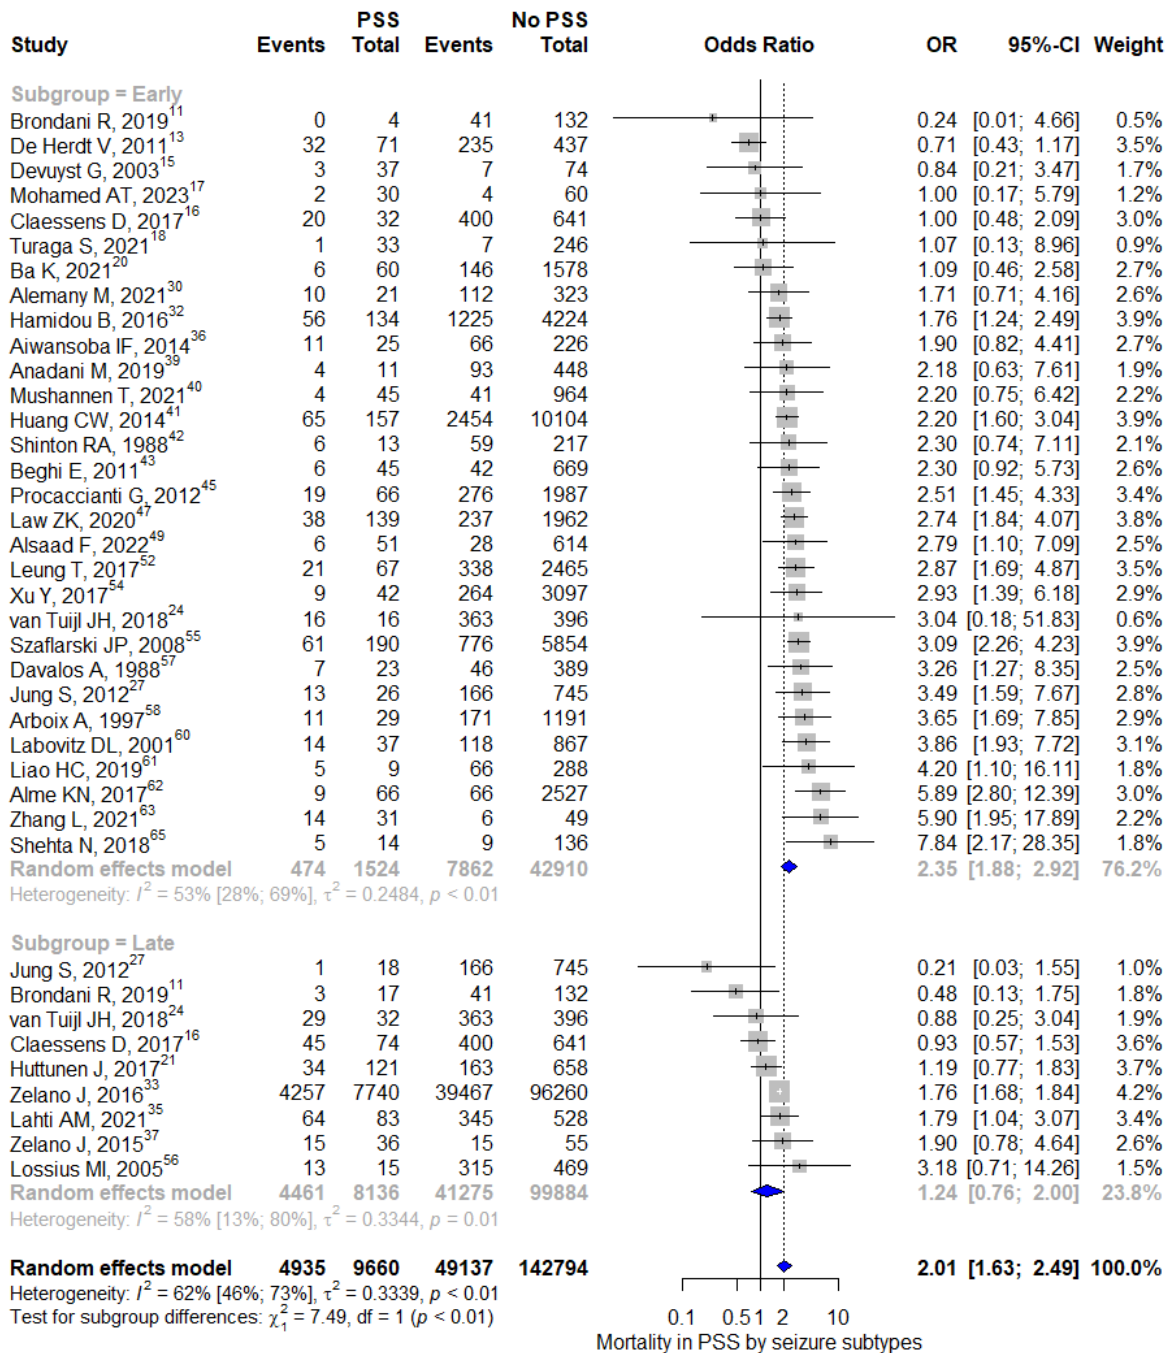

**eFigure 4:** Subgroup analysis based on seizure subtypes for the association of PSS with mortality.

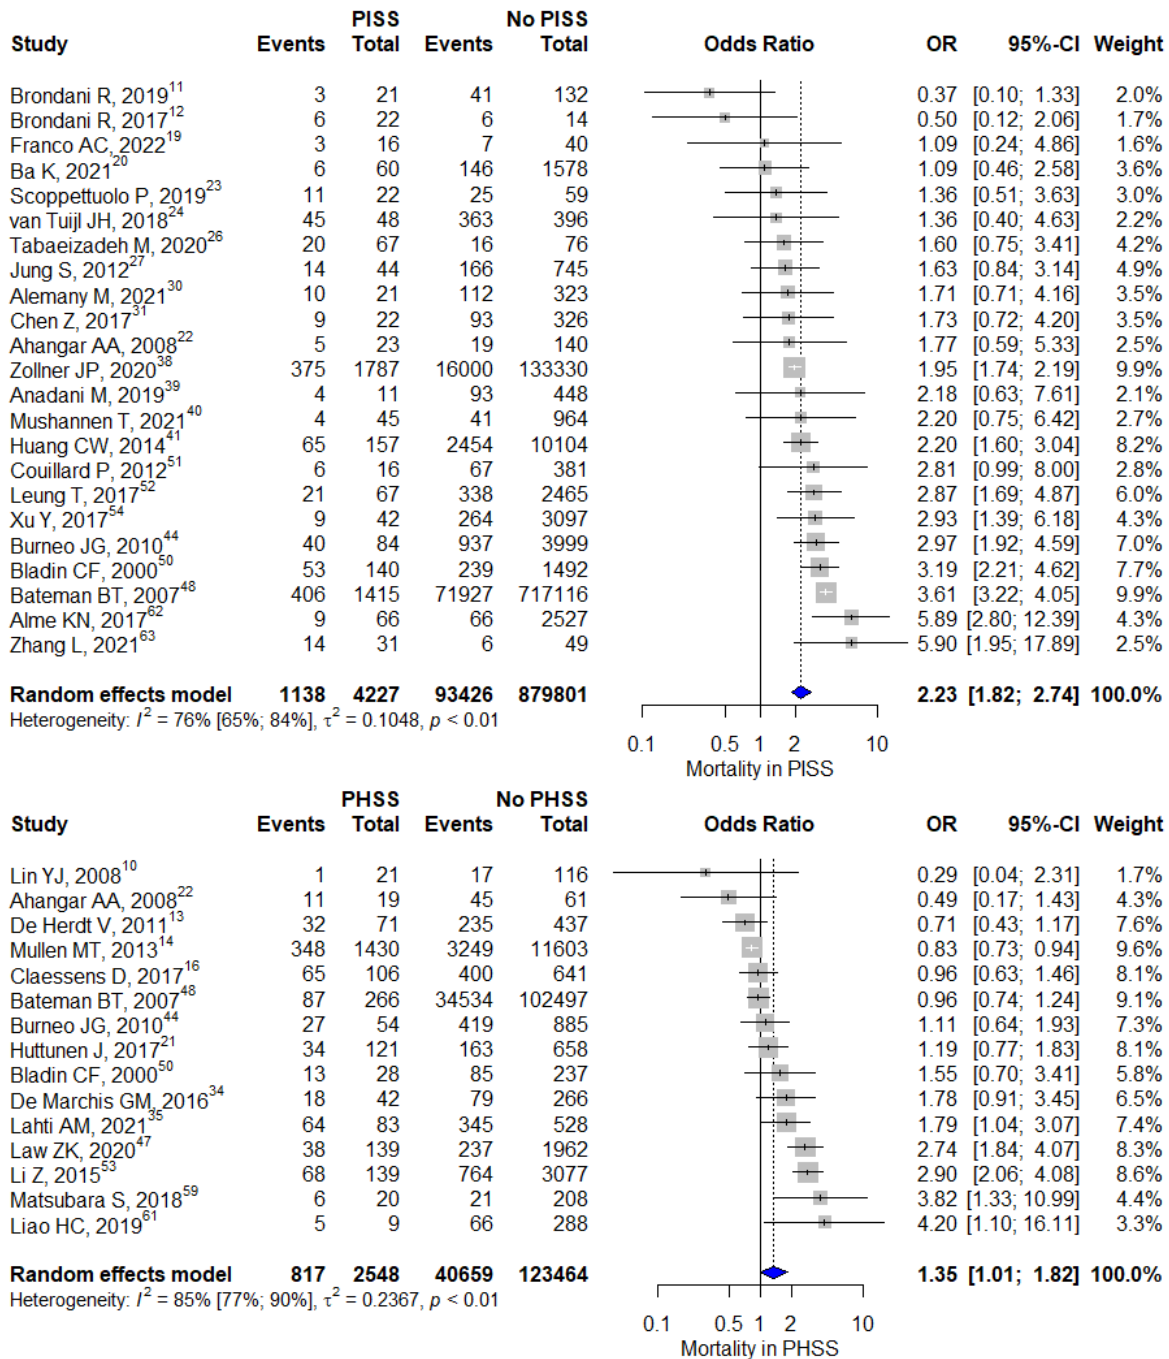

**eFigure 5:** Subgroup analysis based on stroke subtypes [(a) ischemic stroke, (b) hemorrhagic stroke] for the association of PSS with mortality.

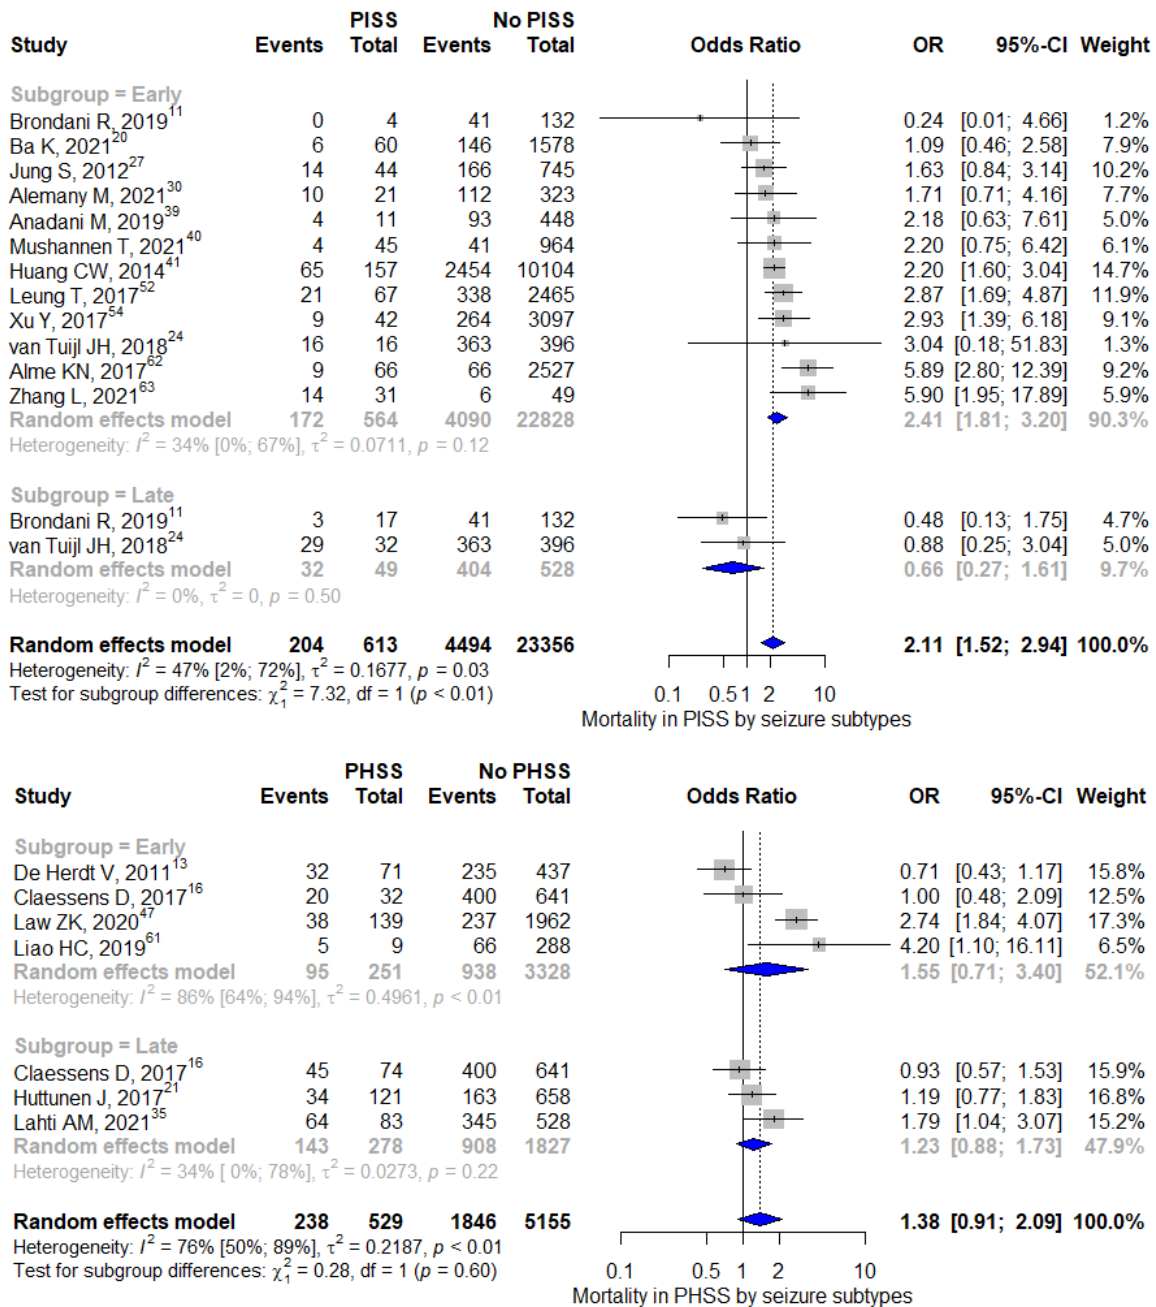

**eFigure 6:** Subgroup analysis based on seizure and stroke subtypes for the association of (a) post-ischemic stroke seizures and (b) post-hemorrhagic stroke seizures with mortality.

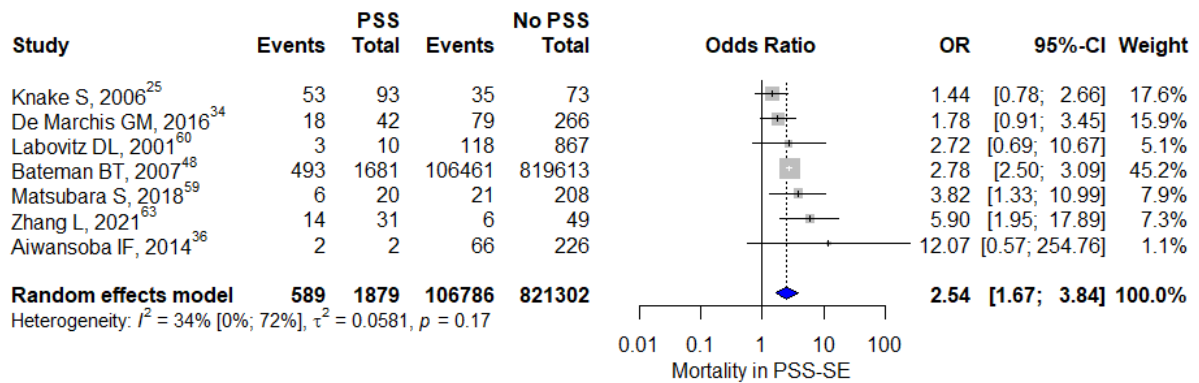

**eFigure 7:** Subgroup analysis on patients with status epilepticus for the association of PSS with mortality.

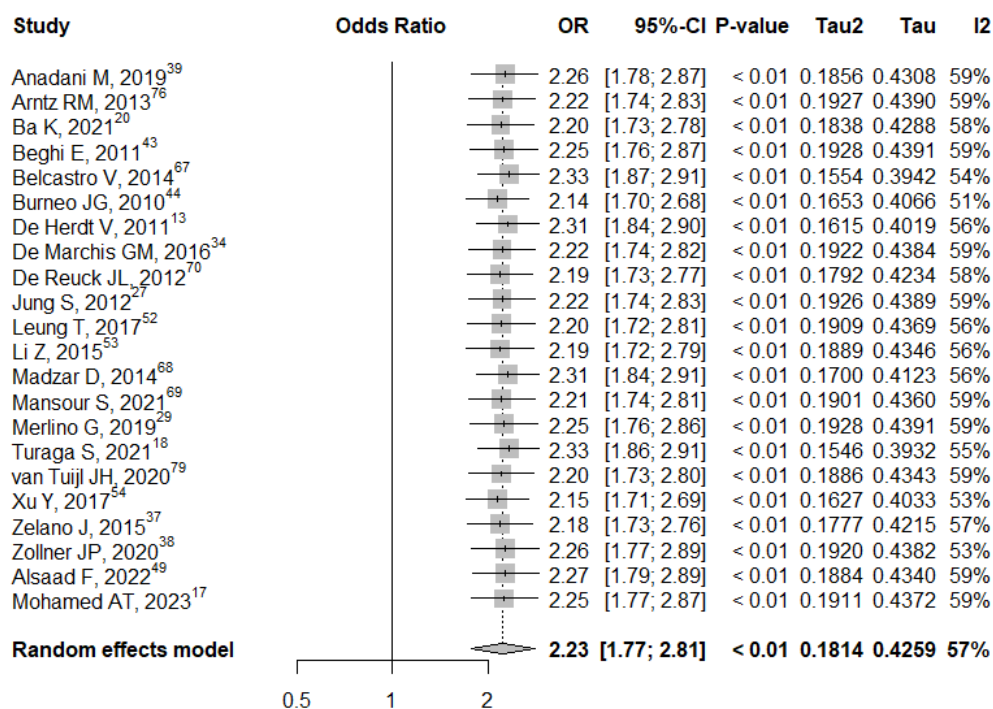

**eFigure 8:** Sensitivity analysis using the leave-one-out method for the association of PSS with poor outcome.

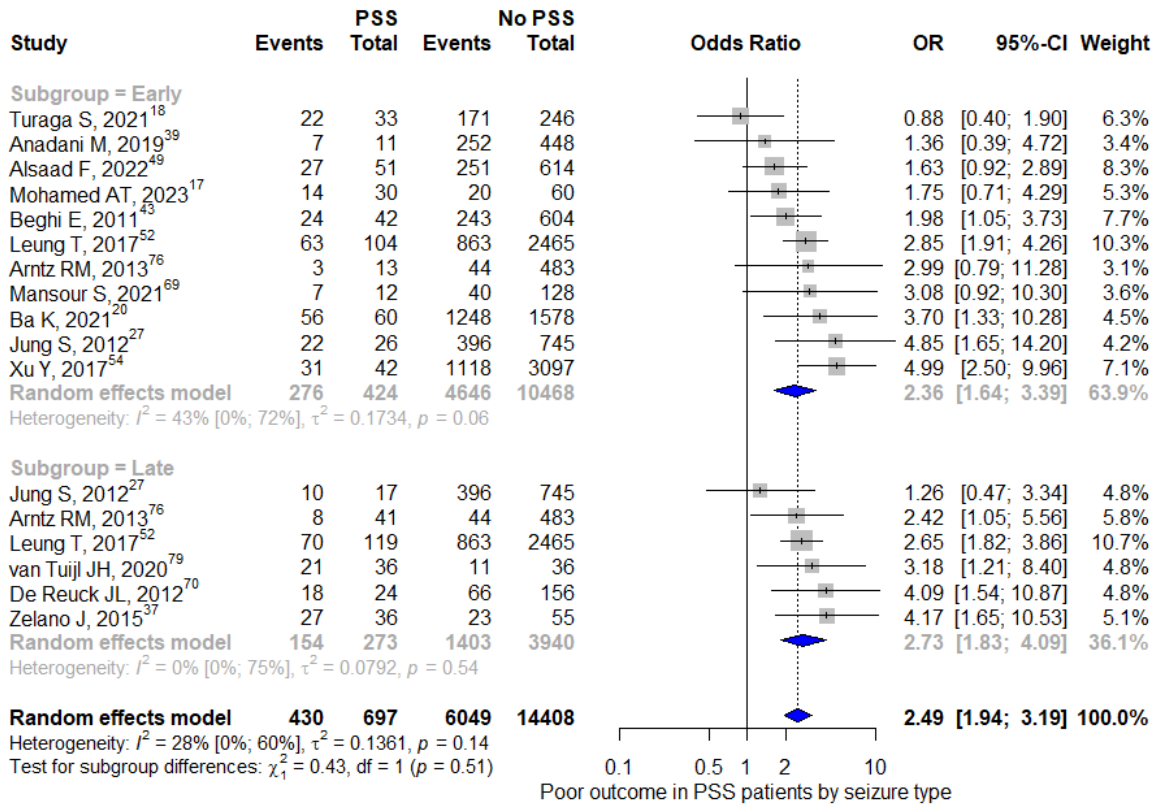

**eFigure 9:** Subgroup analysis based on seizure subtypes for the association of PSS with poor outcome.

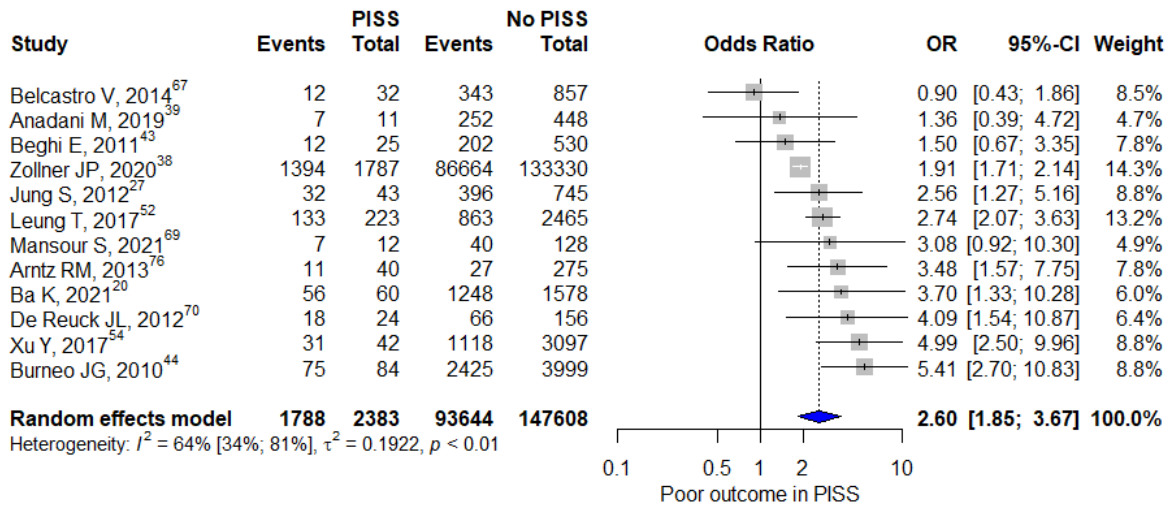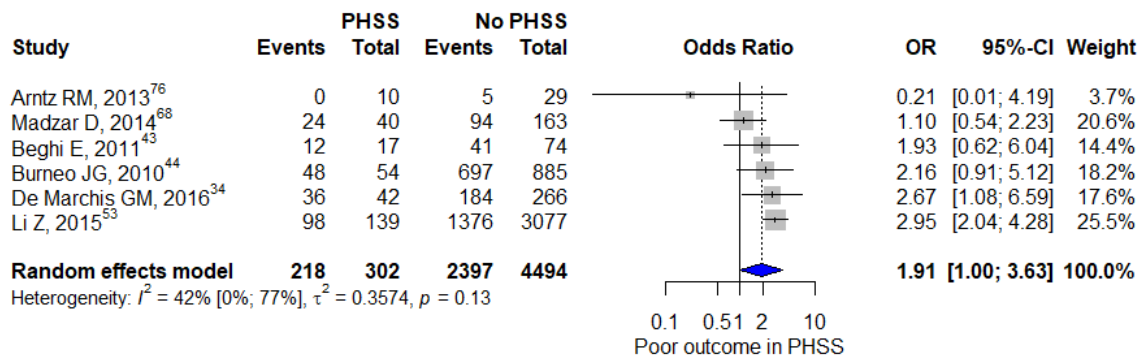

**eFigure 10:** Subgroup analysis based on stroke subtypes [(a) ischemic stroke, (b) hemorrhagic stroke] for the association of PSS with poor outcome.

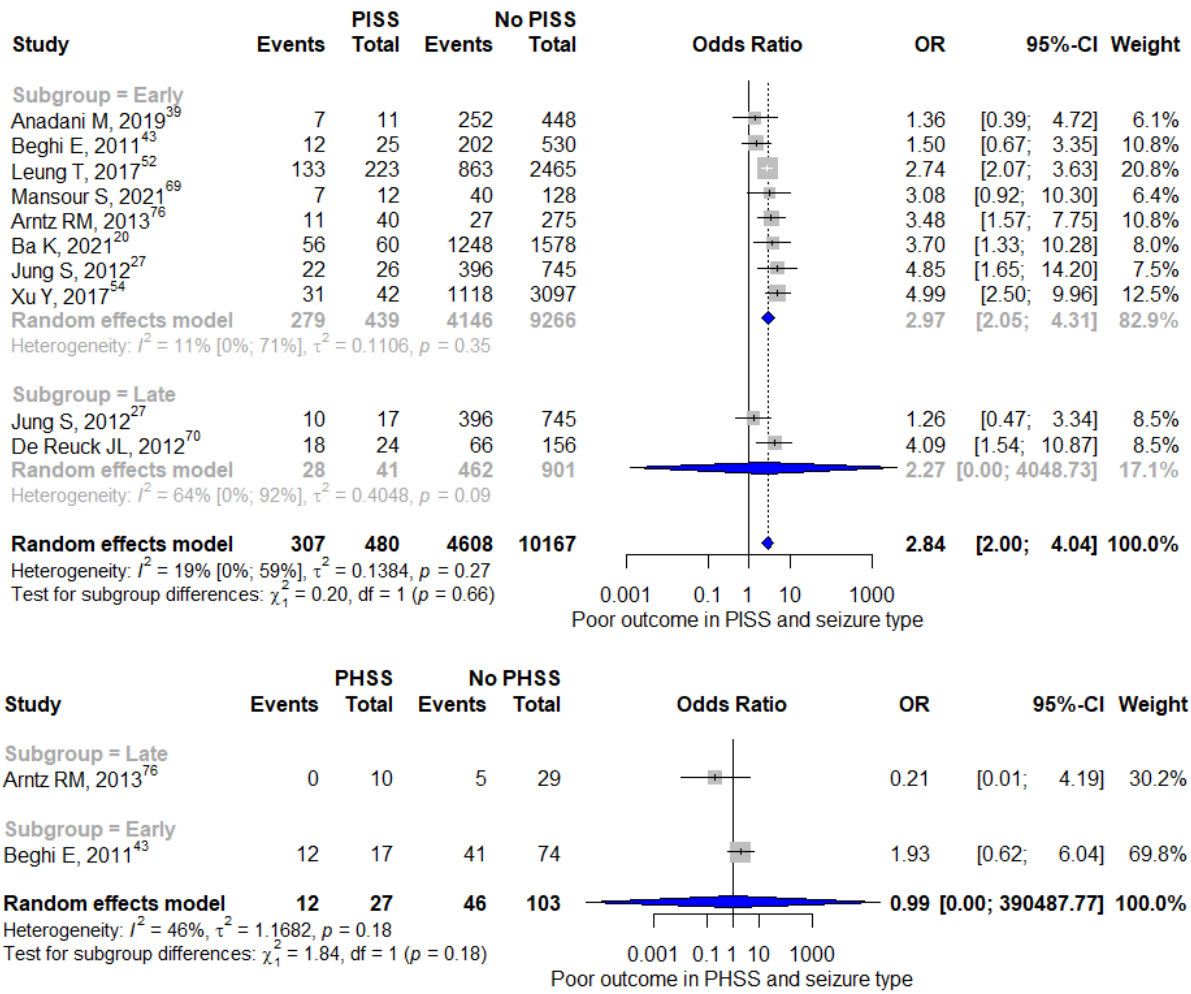

**eFigure 11:** Subgroup analysis based on seizure and stroke subtypes for the association of (a) post-ischemic stroke seizures and (b) post-hemorrhagic stroke seizures with poor outcome.



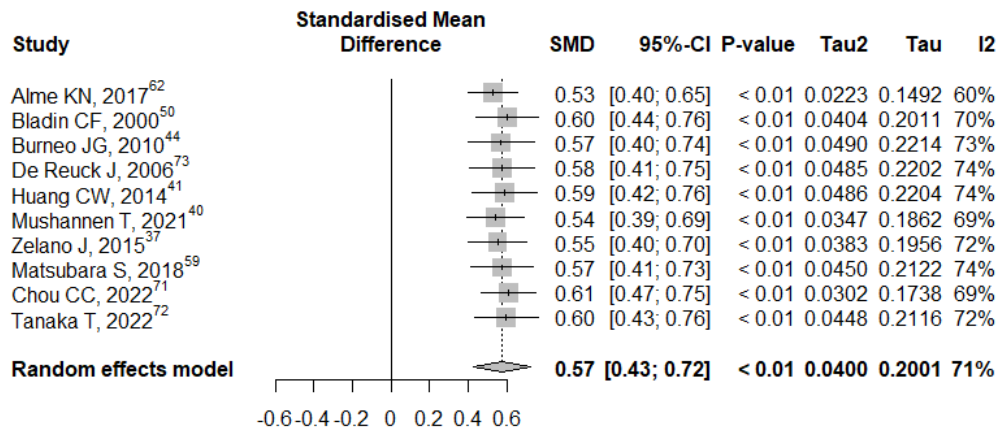

**eFigure 12:** Sensitivity analysis using the leave-one-out method for the association of PSS with disability.

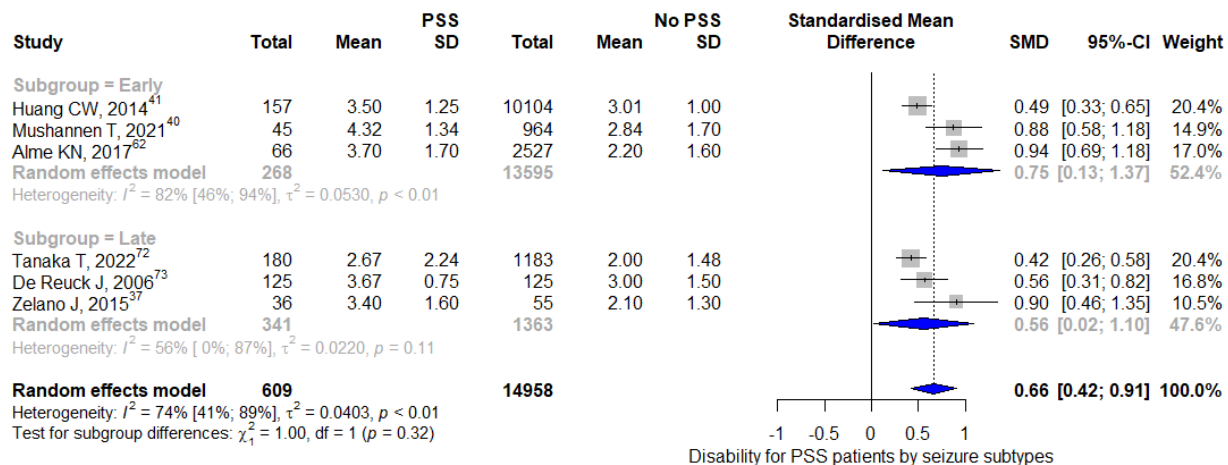

**eFigure 13:** Subgroup analysis based on seizure subtypes for the association of PSS with disability.

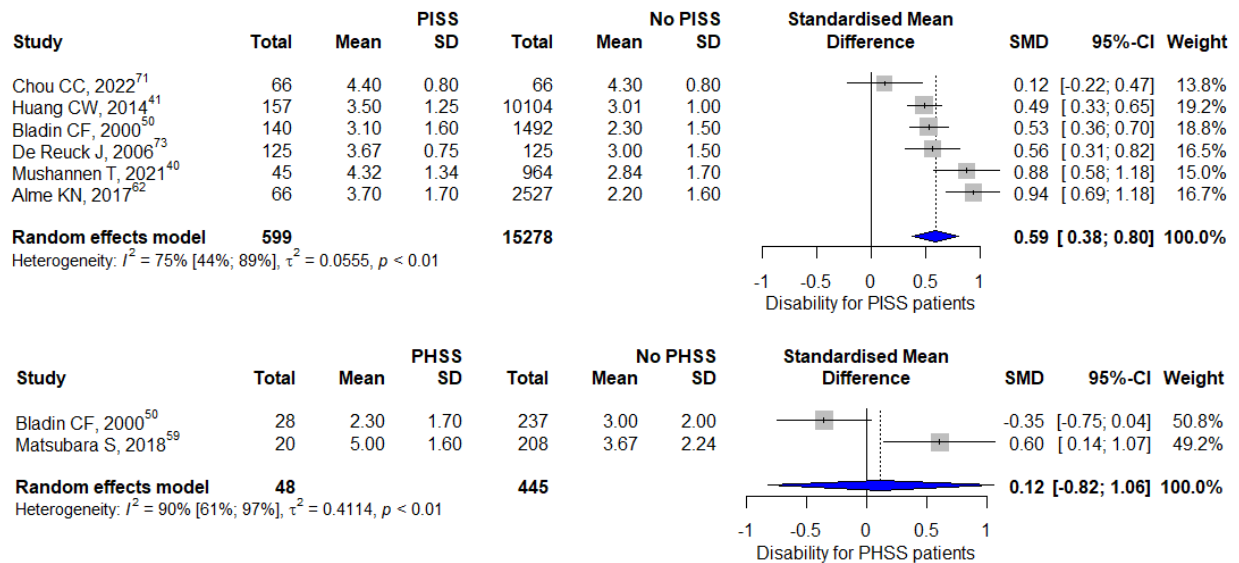

**eFigure 14:** Subgroup analysis based on stroke subtypes [(a) ischemic stroke, (b) hemorrhagic stroke] for the association of PSS with disability.

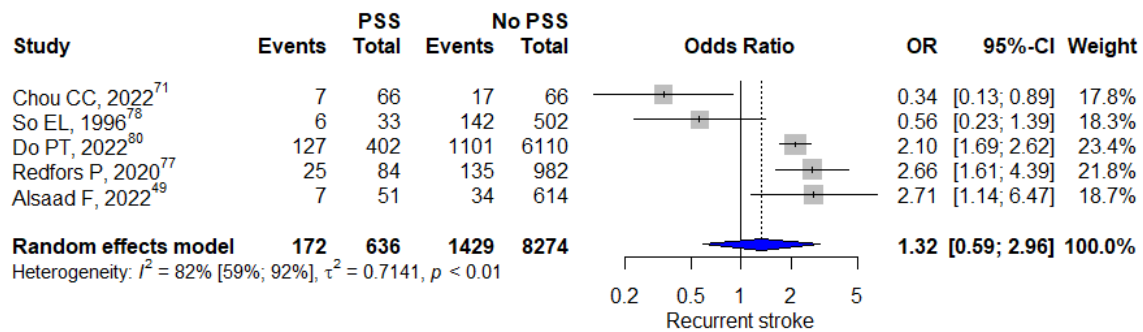

**eFigure 15:** Association of PSS with recurrent stroke

**eTable 1:** Definition of early and late seizures used by the studies included in the systematic review

| S. No | Author              | Cases (PSS) | Early seizures | Late seizures | Definition- Early seizures | Definition- Late seizures | ILAE definition criteria |
|-------|---------------------|-------------|----------------|---------------|----------------------------|---------------------------|--------------------------|
| 1     | Ahangar AA, 2008    | 42          | 15             | 27            | ≤ 7 days                   | > 7 days                  | Not used                 |
| 2     | Aiwansoba IF, 2014  | 25          | 25             | -             | ≤ 7 days                   | NA                        | Not used                 |
| 3     | Aleman M, 2021      | 21          | 21             | -             | ≤ 7 days                   | NA                        | Used 2014                |
| 4     | Alme KN, 2017       | 66          | 66             | -             | ≤ 7 days                   | NA                        | Not used                 |
| 5     | Anadani M, 2019     | 11          | 11             | -             | ≤ 7 days                   | NA                        | Not used                 |
| 6     | Arboix A, 1997      | 29          | 29             | -             | ≤ 48 hours                 | NA                        | Not used                 |
| 7     | Arntz RM, 2013      | 54          | 13             | 41            | ≤ 7 days                   | > 7 days                  | Used 2005                |
| 8     | Arntz RM, 2015      | 76          | 21             | 55            | ≤ 7 days                   | > 7 days                  | Used 2005                |
| 9     | Ba K, 2021          | 60          | 60             | -             | ≤ 7 days                   | NA                        | Used 1993                |
| 10    | Bateman BT, 2007    | 1681        | -              | -             | Not defined                | Not defined               | Not used                 |
| 11    | Beghi E, 2011       | 45          | 45             | -             | ≤ 7 days                   | NA                        | Used 1993                |
| 12    | Belcastro V, 2014   | 32          | 20             | 12            | ≤ 7 days                   | > 7 days                  | Not used                 |
| 13    | Bladin CF, 2000     | 168         | 99             | 69            | ≤ 2 weeks                  | > 2 weeks                 | Used 1981                |
| 14    | Brondani R, 2017    | 22          | 13             | 9             | Not defined                | Not defined               | Used 2014                |
| 15    | Brondani R, 2019    | 21          | 4              | 17            | ≤ 7 days                   | > 7 days                  | Used 2014                |
| 16    | Burneo JG, 2010     | 138         | -              | -             | Not defined                | Not defined               | Used 1975                |
| 17    | Chen Z, 2017        | 22          | 5              | 17            | ≤ 7 days                   | > 7 days                  | Used 2014                |
| 18    | Claessens D, 2017   | 106         | 32             | 74            | ≤ 7 days                   | > 7 days                  | Used 2014                |
| 19    | De Herdt V, 2011    | 71          | 71             | -             | ≤ 7 days                   | NA                        | Used 2010                |
| 20    | De Marchis GM, 2016 | 50          | -              | -             | Not defined                | Not defined               | Not used                 |
| 21    | De Reuck J, 2006    | 125         | -              | 125           | NA                         | > 2 weeks                 | Not used                 |
| 22    | De Reuck JL, 2012   | 24          | 3              | 21            | ≤ 2 weeks                  | > 2 weeks                 | Not used                 |
| 23    | Devuyst G, 2003     | 37          | 37             | -             | ≤ 24 hours                 | NA                        | Not used                 |
| 24    | Guekht A, 2015      | 30          | 27             | 3             | ≤ 7 days                   | > 7 days                  | Used 2005                |
| 25    | Hamidou B, 2016     | 134         | 134            | -             | ≤ 2 weeks                  | NA                        | Used 2010                |
| 26    | Harnod T, 2019      | 1651        | -              | -             | Not defined                | Not defined               | Used 2014                |

|    |                      |      |     |     |             |             |           |
|----|----------------------|------|-----|-----|-------------|-------------|-----------|
| 27 | Huang CW, 2014       | 157  | 157 | -   | ≤ 24 hours  | NA          | Used 2014 |
| 28 | Huttunen J, 2017     | 121  | -   | 121 | NA          | > 7 days    | Used 2014 |
| 29 | Jung S, 2012         | 44   | 26  | 18  | ≤ 24 hours  | > 24 hours  | Not used  |
| 30 | Knake S, 2006        | 93   | -   | -   | Not defined | Not defined | Not used  |
| 31 | Labovitz DL, 2001    | 37   | 37  | -   | ≤ 7 days    | NA          | Used 1993 |
| 32 | Lahti AM, 2021       | 83   | -   | 83  | NA          | > 2 weeks   | Used 2005 |
| 33 | Law ZK, 2020         | 163  | 163 | -   | ≤ 7 days    | NA          | Not used  |
| 34 | Leung T, 2017        | 223  | 104 | 119 | ≤ 7 days    | > 7 days    | Used 2014 |
| 35 | Li Z, 2015           | 139  | -   | -   | Not defined | Not defined | Used 2005 |
| 36 | Liao HC, 2019        | 9    | 9   | -   | ≤ 7 days    | NA          | Used 2010 |
| 37 | Lin YJ, 2008         | 21   | 13  | 8   | ≤ 2 weeks   | > 2 weeks   | Used 1993 |
| 38 | Lossius MI, 2005     | 15   | -   | 15  | NA          | > 7 days    | Used 1993 |
| 39 | Madzar D, 2014       | 40   | 18  | 22  | ≤ 7 days    | > 7 days    | Used 1993 |
| 40 | Mansour S, 2021      | 12   | 12  | -   | ≤ 7 days    | NA          | Used 2010 |
| 41 | Merlino G, 2019      | 51   | -   | -   | Not defined | Not defined | Used 2010 |
| 42 | Mullen MT, 2013      | 1430 | -   | -   | Not defined | Not defined | Not used  |
| 43 | Mushannen T, 2021    | 45   | 45  | -   | ≤ 7 days    | NA          | Not used  |
| 44 | Panitchote A, 2010   | 58   | 35  | 17  | ≤ 2 weeks   | > 2 weeks   | Not used  |
| 45 | Procaccianti G, 2012 | 66   | 66  | -   | ≤ 7 days    | NA          | Used 1981 |
| 46 | Redfors P, 2020      | 84   | -   | 84  | NA          | > 7days     | Used 2014 |
| 47 | Scoppettuolo P, 2019 | 22   | -   | -   | Not defined | Not defined | Not used  |
| 48 | Selim HA, 2009       | 8    | 8   | -   | ≤ 48 hours  | NA          | Used 1993 |
| 49 | Shehta N, 2018       | 14   | 14  | -   | ≤ 7 days    | NA          | Used 1993 |
| 50 | Shinton RA, 1988     | 13   | 13  | -   | ≤ 24 hours  | NA          | Not used  |
| 51 | So EL, 1996          | 33   | 33  | -   | ≤ 7 days    | NA          | Used 1981 |
| 52 | Szaflarski JP, 2008  | 190  | 190 | -   | ≤ 24 hours  | NA          | Not used  |
| 53 | Tabaeizadeh M, 2020  | 67   | -   | -   | Not defined | Not defined | Not used  |
| 54 | Turaga S, 2021       | 33   | 33  | -   | ≤ 7 days    | NA          | Not used  |
| 55 | van Tuijl JH, 2018   | 48   | 16  | 32  | ≤ 7 days    | > 7 days    | Used 2014 |
| 56 | van Tuijl JH, 2020   | 36   | -   | 36  | NA          | > 7 days    | Not used  |

|    |                   |      |    |      |             |             |           |
|----|-------------------|------|----|------|-------------|-------------|-----------|
| 57 | Xu Y, 2017        | 42   | 42 | -    | ≤ 7 days    | NA          | Used 1981 |
| 58 | Zelano J, 2015    | 36   | -  | 36   | NA          | > 7 days    | Used 2014 |
| 59 | Zhang L, 2021     | 31   | 31 | -    | ≤ 48 hours  | NA          | Not used  |
| 60 | Zollner JP, 2020  | 1787 | -  | -    | Not defined | Not defined | Not used  |
| 61 | Couillard P, 2012 | 16   | 10 | 6    | ≤ 7 days    | > 7 days    | Used 1993 |
| 62 | Davalos A, 1988   | 23   | 23 | -    | ≤ 48 hours  | NA          | Not used  |
| 63 | Zelano J, 2016    | 7740 | -  | 7740 | NA          | > 7 days    | Used 2014 |
| 64 | Matsubara S, 2018 | 20   | -  | -    | Not defined | Not defined | Not used  |
| 65 | Alsaad F, 2022    | 51   | 51 |      | ≤ 7 days    | NA          | Not used  |
| 66 | Chou CC, 2022     | 66   | 31 | 35   | ≤ 7 days    | > 7 days    | Not used  |
| 67 | Do PT, 2022       | 402  | -  | -    | Not defined | Not defined | Not used  |
| 68 | Franco AC, 2022   | 16   | 6  | 9    | ≤ 7 days    | > 7 days    | Used 2014 |
| 69 | Mohamed AT, 2023  | 30   | 30 | -    | Not defined | NA          | Not used  |
| 70 | Tanaka T, 2022    | 180  | -  | 180  | NA          | > 7 days    | Used 2014 |
| 71 | Lekoubou A, 2022  | 1574 | -  | 1574 | Not defined | Not defined | Not used  |

**Abbreviations:** PSS- Post-stroke seizures; ILAE- International League Against Epilepsy; NA- Not available.

**Early/late seizure classification:** Early/late seizures were defined using the 7-day cut-off in 39 studies, 24-hour cut-off in five studies, 48-hour cut-off in four studies, and 14-day cut-off in seven studies. 16 studies did not classify seizures as early or late.

**eTable 2:** Baseline characteristics of studies included in the systematic review and meta-analysis

| S. No | Author                         | Country      | Study design               | Early/ Late onset seizure | Stroke subtype | PSE/ no PSE | Age (PSS/ no PSS)                  | Males (PSS/ no PSS) | Follow up duration          | Outcome measures                          |
|-------|--------------------------------|--------------|----------------------------|---------------------------|----------------|-------------|------------------------------------|---------------------|-----------------------------|-------------------------------------------|
| 1     | Mohamed AT, 2023 <sup>17</sup> | Egypt        | Retrospective cohort study | Early-30                  | IS + HS        | 30/ 60      | 53.23 (14.01)/ 60.07 (12.65)       | 13/ 29              | In-hospital                 | Mortality, poor outcome                   |
| 2     | Alsaad F, 2022 <sup>49</sup>   | Saudi Arabia | Retrospective cohort study | Early-51                  | IS + HS        | 51/ 614     | 60.5 (13.8)/ 60.6 (12.5)           | 27/ 429             | In-hospital                 | Mortality, poor outcome, recurrent stroke |
| 3     | Chou C, 2022 <sup>71</sup>     | Taiwan       | Retrospective cohort study | Early-31, Late-35         | IS             | 66/ 66      | 74.5 (13.7)/ 76.7 (11.6)           | 39/ 49              | 62.5 months (mean) (32-145) | Disability, recurrent stroke              |
| 4     | Do PT, 2022 <sup>80</sup>      | Taiwan       | Retrospective cohort study | NA                        | IS             | 402/ 6110   | 36.20 (6.76)/ 37.25 (6.09)         | 262/ 3935           | 8.3 years (mean)            | Recurrent stroke                          |
| 5     | Franco AC, 2022 <sup>19</sup>  | Portugal     | Retrospective cohort study | Early-6, Late-9, Both-1   | IS             | 16/ 40      | 53.9 (8.95)/ 56.1 (11.5)           | 7/ 20               | 21 months (median)          | Mortality                                 |
| 6     | Lekoubou A, 2022 <sup>74</sup> | USA          | Retrospective cohort study | Late-1574                 | IS + HS        | 1574/ 22106 | 48.4 (9.4)/ 49.8 (8.2)             | 642/ 9762           | 5 years                     | Dementia                                  |
| 7     | Tanaka T, 2022 <sup>72</sup>   | Japan        | Retrospective cohort study | Late-180                  | IS + HS        | 180/ 1183   | 74 (64.3-82)/ 74 (65-81)           | 113/ 743            | 28.83 months (mean)         | Disability                                |
| 8     | Aleman M, 2021 <sup>30</sup>   | Spain        | Retrospective cohort study | Early-21                  | IS             | 21/ 323     | 69 ± 12/ 64 ± 11 (n=270)           | 12/ 153/270         | 5 years                     | Mortality                                 |
| 9     | Ba K, 2021 <sup>20</sup>       | France       | Retrospective cohort study | Early-60                  | IS             | 60/ 1578    | 71 (59-79)/ 71 (60-82)             | 39/ 744             | 7 days                      | Mortality, poor outcome                   |
| 10    | Lahti AM, 2021 <sup>35</sup>   | Finland      | Ambispective cohort study  | Late-83                   | HS (ICH)       | 83/ 528     | 65.2 (60.6-72.9)/ 66.8 (59.0-76.0) | 47/ 287             | 8.8 (0.25-23.9) years       | Mortality                                 |



|    |                                   |             |                            |                  |          |              |                                |            |                             |                         |
|----|-----------------------------------|-------------|----------------------------|------------------|----------|--------------|--------------------------------|------------|-----------------------------|-------------------------|
| 11 | Mansour S, 2021 <sup>69</sup>     | Lebanon     | Retrospective cohort study | Early-12         | IS       | 12/ 128      | 68.42 ± 9.89/ 65.98 ± 14.36    | 4/ 76      | In-hospital                 | Poor outcome            |
| 12 | Mushannen T, 2021 <sup>40</sup>   | Qatar       | Case-control               | Early-45         | IS       | 45/ 964      | 57.8 ± 15.8/ 53 ± 13.4         | NA/ NA     | In-hospital                 | Mortality, disability   |
| 13 | Turaga S, 2021 <sup>18</sup>      | India       | Prospective cohort study   | Early-33         | IS + HS  | 33/ 246      | 38.88 ± 16.74/ 51.53 ± 16.69   | 20/ 167    | In-hospital                 | Mortality, poor outcome |
| 14 | Zhang L, 2021 <sup>63</sup>       | China       | Prospective cohort study   | Early-31         | IS       | 31/ 49       | 83 (74.0–87.0)/ 76 (64.5–86.5) | 10/ 26     | In-hospital                 | Mortality               |
| 15 | Law ZK, 2020 <sup>47</sup>        | UK          | Prospective cohort study   | Early-163        | HS (ICH) | 163/ 2162    | 69.0 ± 13.3/ 68.9 ± 13.9       | 85/ 1216   | 3 months                    | Mortality               |
| 16 | Redfors P, 2020 <sup>77</sup>     | Sweden      | Retrospective cohort study | Late-84          | IS       | 84/ 982      | NA/ NA                         | 7/ 68      | 8 (0-14) years              | Recurrent stroke        |
| 17 | Tabaeizadeh M, 2020 <sup>26</sup> | USA         | Retrospective cohort study | NA               | IS       | 67/ 76       | 67 (56.5–77.8)/ 66 (49–77.5)   | 33/ 39     | In-hospital                 | Mortality               |
| 18 | van Tuijl JH, 2020 <sup>79</sup>  | Netherlands | Case-control               | Late-36          | IS + HS  | 36/ 36       | 63.4 ± 13.1/ 64.3 ± 12.4       | 26/ 28     | NA                          | Poor outcome            |
| 19 | Zollner JP, 2020 <sup>38</sup>    | Germany     | Retrospective cohort study | NA               | IS       | 1787/ 133330 | 75.4 ± 12.4/ 73.9 ± 12.7       | 827/ 67065 | In-hospital                 | Mortality, poor outcome |
| 20 | Anadani M, 2019 <sup>39</sup>     | USA         | Retrospective cohort study | Early-11         | IS       | 11/ 448      | 62.55 ± 16.9/ 67.64 ± 14.5     | 7/ 223     | 3 months                    | Mortality, poor outcome |
| 21 | Brondani R, 2019 <sup>11</sup>    | Brazil      | Retrospective cohort study | Early-4, Late-17 | IS       | 21/ 132      | 67.05 ± 10.8/ 67.27 ± 13.5     | 11/ 68     | 2 years                     | Mortality               |
| 22 | Harnod T, 2019 <sup>46</sup>      | Taiwan      | Retrospective cohort study | NA               | NA       | 1651/ 11952  | 69/ 69.8                       | 966/ 6599  | 4.21 (range 0.003–14) years | Mortality               |
| 23 | Liao HC, 2019 <sup>61</sup>       | Taiwan      | Retrospective cohort study | Early-9          | HS (ICH) | 9/ 288       | 62 (59–65)/ 62 (50–76)         | 7/ 206     | In-hospital                 | Mortality               |
| 24 | Merlino G, 2019 <sup>29</sup>     | Italy       | Prospective cohort study   | Early, Late      | IS + HS  | 51/ 584      | 72.3 ± 14.8/ 77.5 ± 11.5       | 21/ 276    | 2 years                     | Mortality, poor outcome |

|    |                                    |              |                            |                     |               |           |                                         |          |                             |                         |
|----|------------------------------------|--------------|----------------------------|---------------------|---------------|-----------|-----------------------------------------|----------|-----------------------------|-------------------------|
|    |                                    |              |                            | (No data)           |               |           |                                         |          |                             |                         |
| 25 | Scoppettuolo P, 2019 <sup>23</sup> | Belgium      | Retrospective cohort study | NA                  | IS            | 22/ 59    | 71 (mean)/<br>71 (mean)                 | 13/ 33   | 3 months                    | Mortality               |
| 26 | Shehta N, 2018 <sup>65</sup>       | Egypt        | Prospective cohort study   | Early-14            | IS + HS (ICH) | 14/ 136   | 65.2 ± 11.6/<br>61.3 ± 13.5             | 8/ 87    | In-hospital                 | Mortality               |
| 27 | van Tuijl JH, 2018 <sup>24</sup>   | Netherlands  | Prospective cohort study   | Early-16, Late-32   | IS            | 48/ 396   | 70.4 ± 12.1/<br>71.83 ± 10.23           | 23/ 202  | 26 ± 0.9 years              | Mortality               |
| 28 | Matsubara S, 2018 <sup>69</sup>    | Japan        | Retrospective cohort study | NA                  | HS            | 20/ 208   | 70.6 (11.9)/<br>67.6 (14.2)             | 9/ 127   | In-hospital                 | Mortality, disability   |
| 29 | Alme KN, 2017 <sup>62</sup>        | Norway       | Retrospective cohort study | Early-66            | IS            | 66/ 2527  | 73.3 ± 15.8/<br>70.8 ± 14.8             | 31/ 1068 | 7 days                      | Mortality, disability   |
| 30 | Brondani R, 2017 <sup>12</sup>     | Brazil       | Retrospective cohort study | Early-13, Late-9    | IS            | 22/ 14    | 57.73 ± 10.32/<br>60.86 ± 14.26         | 11/ 8    | 1086 (1172) days            | Mortality               |
| 31 | Chen Z, 2017 <sup>31</sup>         | Australia    | Retrospective cohort study | Early-5, Late-17    | IS            | 22/ 326   | 74 (59–79)/<br>73 (63–80)               | 8/ 182   | 559 (IQR 107.5–1188.5) days | Mortality               |
| 32 | Claessens D, 2017 <sup>16</sup>    | Netherlands  | Retrospective cohort study | Early-32, Late-74   | HS (ICH)      | 106/ 641  | 66.7 (62.8–70.6)/<br>72.7 (71.7–73.7)   | 60/ 339  | 4.8 (IQR 0–12.6) years      | Mortality               |
| 33 | Huttunen J, 2017 <sup>21</sup>     | Finland      | Retrospective cohort study | Late-121            | HS (SAH)      | 121/ 658  | 47/ 50                                  | 58/ 273  | 12 years (median)           | Mortality               |
| 34 | Leung T, 2017 <sup>52</sup>        | Hong Kong    | Retrospective cohort study | Early-104, Late-119 | IS            | 223/ 2465 | 65 years (56–101)/<br>62 years (32–100) | 97/ 1454 | 6.17 years (mean)           | Mortality, poor outcome |
| 35 | Xu Y, 2017 <sup>54</sup>           | Multicentric | Prospective cohort study   | Early-42            | IS            | 42/ 3097  | 66 ± 15/ 67 ± 13                        | 32/ 1928 | 3 months                    | Mortality, poor outcome |
| 36 | De Marchis GM, 2016 <sup>34</sup>  | USA          | Retrospective cohort study | NA                  | HS (SAH)      | 50/ 352   | 66 (56–74)/<br>57 (46–66)               | 8/ 112   | 3 months                    | Mortality, poor outcome |

|    |                                  |             |                            |                   |               |            |                                        |          |                      |                                     |
|----|----------------------------------|-------------|----------------------------|-------------------|---------------|------------|----------------------------------------|----------|----------------------|-------------------------------------|
| 37 | Hamidou B, 2016 <sup>32</sup>    | France      | Retrospective cohort study | Early-134         | IS + HS       | 134/4224   | NA/NA                                  | 58/1969  | 1 year               | Mortality                           |
| 38 | Zelano J, 2016 <sup>33</sup>     | Sweden      | Retrospective cohort study | Late-7740         | IS + HS       | 7740/98715 | NA/NA                                  | NA/NA    | 5 years              | Mortality                           |
| 39 | Arntz RM, 2015 <sup>28</sup>     | Netherlands | Prospective cohort study   | Early-21, Late-55 | IS + TIA      | 76/555     | 40.4 ± 7.3/<br>40.8 ± 7.8              | 39/255   | 12.5 (8.6) years     | Mortality                           |
| 40 | Guekht A, 2015 <sup>66</sup>     | Russia      | Prospective cohort study   | Early-27, Late-3  | IS + HS       | 30/70      | 65.9 ± 10.6/<br>67.8 ± 10.9            | 16/36    | 23 (range 2–56) days | Mortality                           |
| 41 | Li Z, 2015 <sup>53</sup>         | China       | Prospective cohort study   | NA                | HS (ICH)      | 139/3077   | 62 (52-73)/<br>62 (53-72)              | 82/1893  | 1 year               | Mortality, poor outcome             |
| 42 | Zelano J, 2015 <sup>37</sup>     | Sweden      | Retrospective cohort study | Late-36           | IS + HS (ICH) | 36/55      | 70.7 ±<br>10.39/69.3<br>± 11.71        | 22/39    | 3 years              | Mortality, poor outcome, disability |
| 43 | Aiwansoba IF, 2014 <sup>36</sup> | Nigeria     | Prospective cohort study   | Early-25          | IS + HS       | 25/226     | 62.68 ±<br>15.70/59.67<br>± 13.04      | 19/113   | 42 days              | Mortality                           |
| 44 | Belcastro V, 2014 <sup>67</sup>  | Italy       | Prospective cohort study   | Early-20, Late-12 | IS            | 32/857     | 66.5 (61.0–<br>78)/65.0<br>(58.0–77.0) | 16/550   | 22.5 (2-43) months   | Poor outcome                        |
| 45 | Huang CW, 2014 <sup>41</sup>     | Canada      | Retrospective cohort study | Early-157         | IS            | 157/10104  | 68.9 ± 1.4/<br>72.2 ± 0.1              | 67/5253  | 1 year               | Mortality, disability               |
| 46 | Madzar D, 2014 <sup>68</sup>     | Germany     | Retrospective cohort study | Early-18, Late-22 | HS (ICH)      | 40/163     | 67.6 ± 9.4/<br>66.2 ± 11.3             | 27/89    | 1 year               | Poor outcome                        |
| 47 | Arntz RM, 2013 <sup>76</sup>     | Netherlands | Retrospective cohort study | Early-13, Late-41 | IS + TIA + HS | 54/483     | 38.1 ± 7.3/<br>40.2 ± 8.0              | 28/213   | 9.8 (8.4) years      | Poor outcome                        |
| 48 | Mullen MT, 2013 <sup>14</sup>    | USA         | Retrospective cohort study | NA                | HS (ICH)      | 1430/11603 | 64 (mean)/<br>70 (mean)                | 747/5709 | In-hospital          | Mortality                           |
| 49 | De Reuck JL, 2012 <sup>70</sup>  | Belgium     | Retrospective cohort study | Early-3, Late-21  | IS            | 24/156     | 71.0 ± 10.8/<br>65.4 ± 15.8            | 16/94    | 4.5 (2-7) years      | Poor outcome                        |

|    |                                    |             |                            |                   |               |              |                             |             |                         |                                     |
|----|------------------------------------|-------------|----------------------------|-------------------|---------------|--------------|-----------------------------|-------------|-------------------------|-------------------------------------|
| 50 | Jung S, 2012 <sup>27</sup>         | Switzerland | Retrospective cohort study | Early-26, Late-18 | IS            | 44/ 761      | 59.1 ± 15.73/ 63.6 ± 13.6   | 24/ 426     | 3 months                | Mortality, poor outcome             |
| 51 | Procaccianti G, 2012 <sup>45</sup> | Italy       | Prospective cohort study   | Early-66          | IS + HS (ICH) | 66/ 1987     | 81 (73–88)/ 82 (73–88)      | 37/ 999     | 1 month                 | Mortality                           |
| 52 | Couillard P, 2012 <sup>51</sup>    | Canada      | Retrospective cohort study | Early-10, Late-6  | IS            | 16/ 384      | 72.5 (29–94)/ 74.0 (24–101) | 11/ 188     | In-hospital             | Mortality                           |
| 53 | Beghi E, 2011 <sup>43</sup>        | Italy       | Prospective cohort study   | Early-45          | IS + HS       | 45/ 669      | NA/ NA                      | 24/ 375     | 1 month                 | Mortality, poor outcome             |
| 54 | De Herdt V, 2011 <sup>13</sup>     | France      | Prospective cohort study   | Early-71          | HS (ICH)      | 71/ 451      | NA/ NA                      | 41/ 233     | 6 months                | Mortality                           |
| 55 | Burneo JG, 2010 <sup>44</sup>      | Canada      | Retrospective cohort study | NA                | IS + HS       | 138/ 4889    | 68.6 ± 1.4/ 71.5 ± 0.2      | 78/ 2555    | 1 year                  | Mortality, poor outcome, disability |
| 56 | Panitchote A, 2010 <sup>64</sup>   | Thailand    | Retrospective cohort study | Early-35, Late-17 | IS + HS       | 58/ 314      | 55.13 (mean)/ 57.9 (mean)   | 34/ 87      | 1 year                  | Mortality                           |
| 57 | Selim HA, 2009 <sup>75</sup>       | Egypt       | Prospective cohort study   | Early-8           | IS + HS       | 8/ 58        | 63 (mean)                   | NA/ NA      | 18 months               | Dementia                            |
| 58 | Ahangar AA, 2008 <sup>22</sup>     | Iran        | Retrospective cohort study | Early-15, Late-27 | IS + HS       | 42/ 201      | NA/ NA                      | 25/ NA      | 2 years                 | Mortality                           |
| 59 | Lin YJ, 2008 <sup>10</sup>         | Taiwan      | Retrospective cohort study | Early-13, Late-8  | HS (SAH)      | 21/ 116      | 54.2 ± 14.7/ 56.6 ± 14.1    | 9/ 35       | 1 year                  | Mortality                           |
| 60 | Szaflarski JP, 2008 <sup>55</sup>  | USA         | Retrospective cohort study | Early-190         | IS + TIA + HS | 190/ 5854    | 68 ± 15/ 71.7 ± 13.2        | 77/ 2556    | 1 month                 | Mortality                           |
| 61 | Bateman BT, 2007 <sup>48</sup>     | USA         | Retrospective cohort study | NA                | IS + HS       | 1681/ 819613 | NA/ NA                      | 739/ 367759 | In-hospital             | Mortality                           |
| 62 | De Reuck J, 2006 <sup>73</sup>     | Belgium     | Retrospective cohort study | Late-125          | IS            | 125/ 125     | 69.4 ± 14.6/ 72.3 ± 9.7     | 69/ 69      | 38 (range 4–102) months | Disability                          |
| 63 | Knake S, 2006 <sup>25</sup>        | Germany     | Retrospective cohort study | NA                | IS + HS       | 93/ 73       | 71 (21–90)/ 75 (44–96)      | 42/ 33      | 3 years                 | Mortality                           |
| 64 | Lossius MI, 2005 <sup>56</sup>     | Norway      | Prospective cohort study   | Late-15           | IS            | 15/ 469      | 74.3 ± 6/ 76.3 ± 7          | 9/ 242      | 32(14-96) months        | Mortality                           |

|    |                                 |                                                 |                            |                   |                     |           |                          |          |                 |                       |
|----|---------------------------------|-------------------------------------------------|----------------------------|-------------------|---------------------|-----------|--------------------------|----------|-----------------|-----------------------|
| 65 | Devuyst G, 2003 <sup>15</sup>   | Switzerland                                     | Case-control               | Early-37          | IS + HS             | 37/ 74    | NA/ NA                   | NA/ NA   | In-hospital     | Mortality             |
| 66 | Labovitz DL, 2001 <sup>60</sup> | USA                                             | Retrospective cohort study | Early-37          | IS + HS             | 37/ 867   | 68.3 ± 17.2/ NA          | 15/ 379  | 1 month         | Mortality             |
| 67 | Bladin CF, 2000 <sup>50</sup>   | Multicentric (Canada, Australia, Israel, Italy) | Prospective cohort study   | Early-99, Late-69 | IS + HS             | 168/ 1729 | 71.7 ± 13.6/ 72.8 ± 11.9 | 100/ 993 | 1 year          | Mortality, disability |
| 68 | Arboix A, 1997 <sup>58</sup>    | Spain                                           | Retrospective cohort study | Early-29          | IS + HS             | 29/ 1191  | 67.6 ± 18.5/ 71.3 ± 13   | 20/ 615  | In-hospital     | Mortality             |
| 69 | So EL, 1996 <sup>78</sup>       | USA                                             | Retrospective cohort study | Early-33          | IS                  | 33/ 502   | 72.4 ± 10.2/ 71.5 ± 12.1 | 21/ 259  | 5.5 ± 7.1 years | Recurrent stroke      |
| 70 | Shinton RA, 1988 <sup>42</sup>  | UK                                              | Prospective cohort study   | Early-13          | IS + HS (ICH + SAH) | 13/ 217   | NA/ NA                   | NA/ NA   | 27 months       | Mortality             |
| 71 | Davalos A, 1988 <sup>57</sup>   | Italy                                           | Prospective cohort study   | Early-23          | IS + HS             | 23/ 389   | 64.8 ± 15/ 65.1 ± 11     | NA/ NA   | In-hospital     | Mortality             |

**Abbreviations:** PSS- Post-stroke seizures; IS- Ischemic stroke; HS- Hemorrhagic stroke; ICH- Intracerebral hemorrhage; SAH- Subarachnoid hemorrhage; USA- United States of America; UK- United Kingdom; IQR- Interquartile range; NA- Not available.

**eTable 3:** Risk factors associated with PSS

|                            | <b>OR (95% CI)</b>         | <b>p-value</b> |
|----------------------------|----------------------------|----------------|
| Hypertension               | 0.88 (0.78 to 1.00)        | 0.05           |
| Diabetes Mellitus          | 0.98 (0.87 to 1.10)        | 0.72           |
| Hyperlipidemia             | <b>0.81 (0.69 to 0.94)</b> | <b>0.006</b>   |
| Prior CVD                  | <b>1.28 (1.01 to 1.63)</b> | <b>0.04</b>    |
| Ischemic Heart Disease     | <b>1.28 (1.06 to 1.55)</b> | <b>0.01</b>    |
| Atrial Fibrillation        | <b>1.24 (1.07 to 1.44)</b> | <b>0.007</b>   |
| Smoking                    | 0.92 (0.77 to 1.09)        | 0.30           |
| Alcohol                    | 1.38 (0.79 to 2.40)        | 0.24           |
| Thrombolysis               | 0.87 (0.62 to 1.23)        | 0.40           |
| Hemorrhagic Transformation | <b>2.17 (1.55 to 3.04)</b> | <b>0.0003</b>  |

**Abbreviations:** PSS- Post Stroke Seizures; OR- Odds Ratio; CI- Confidence Interval; CVD- Cerebrovascular Disease.

**eTable 4:** Risk of bias (quality) assessment for the studies included in the systematic review and meta-analysis

| S. No | Author, Year      | Item 1   | Item 2   | Item 3   | Item 4 | Item 5   | Item 6 | Item 7   | Item 8   | Item 9 | Item 10  | Item 11  | Risk of bias |
|-------|-------------------|----------|----------|----------|--------|----------|--------|----------|----------|--------|----------|----------|--------------|
| 1     | Mohamed AT, 2023  | Low      | High     | High     | High   | High     | Low    | Low      | High     | Low    | Low      | High     | High         |
| 2     | Alsaad F, 2022    | Low      | Moderate | High     | Low    | Low      | Low    | Low      | High     | High   | High     | Moderate | High         |
| 3     | Chou CC, 2022     | Low      | Low      | High     | Low    | Low      | Low    | Low      | Low      | Low    | Low      | Low      | Low          |
| 4     | Do PT, 2022       | Low      | High     | High     | Low    | Low      | Low    | Low      | Low      | Low    | Low      | Low      | Moderate     |
| 5     | Franco AC, 2022   | Low      | Low      | Low      | High   | High     | Low    | Moderate | Low      | High   | High     | High     | High         |
| 6     | Lekoubou A, 2022  | Low      | Moderate | High     | Low    | Low      | Low    | Moderate | Low      | Low    | Low      | Low      | Moderate     |
| 7     | Tanaka T, 2022    | Low      | Low      | Low      | Low    | Low      | Low    | Low      | Low      | High   | High     | Low      | Moderate     |
| 8     | Aleman M, 2021    | Low      | Low      | Low      | Low    | Moderate | Low    | Moderate | Low      | Low    | Moderate | Low      | Low          |
| 9     | Ba K, 2021        | Low      | Low      | Low      | Low    | Low      | Low    | Low      | High     | Low    | Low      | Low      | Low          |
| 10    | Lahti AM, 2021    | Low      | Low      | Moderate | Low    | Low      | Low    | Moderate | Low      | Low    | Low      | Low      | Low          |
| 11    | Mansour S, 2021   | Moderate | High     | High     | Low    | Low      | Low    | Low      | High     | Low    | Low      | Low      | Moderate     |
| 12    | Mushanneh T, 2021 | Moderate | Moderate | High     | High   | High     | Low    | Low      | High     | Low    | Low      | High     | High         |
| 13    | Turaga S, 2021    | Low      | Low      | Low      | Low    | Low      | Low    | Low      | High     | Low    | Low      | Low      | Low          |
| 14    | Zhang L, 2021     | Low      | Low      | Low      | Low    | Low      | Low    | Low      | High     | Low    | Low      | Low      | Low          |
| 15    | Law ZK, 2020      | Low      | Low      | Moderate | Low    | Low      | Low    | Moderate | Moderate | Low    | Moderate | Low      | Moderate     |

|    |                     |          |          |          |      |          |     |          |          |          |          |          |                 |
|----|---------------------|----------|----------|----------|------|----------|-----|----------|----------|----------|----------|----------|-----------------|
| 16 | Redfors P, 2020     | Low      | Low      | Moderate | Low  | Low      | Low | Low      | Low      | High     | High     | Low      | <b>Moderate</b> |
| 17 | Tabaeizadeh M, 2020 | Low      | Low      | Low      | Low  | Low      | Low | Low      | High     | Low      | Low      | Low      | <b>Low</b>      |
| 18 | van Tuijl JH, 2020  | Low      | Low      | Moderate | High | High     | Low | Low      | Moderate | Moderate | Low      | High     | <b>Moderate</b> |
| 19 | Zollner JP, 2020    | Low      | High     | High     | Low  | Low      | Low | Low      | High     | Low      | Low      | Low      | <b>Moderate</b> |
| 20 | Anadani M, 2019     | Low      | Low      | Low      | Low  | Low      | Low | Low      | Moderate | Low      | Low      | Low      | <b>Low</b>      |
| 21 | Brondani R, 2019    | Moderate | Low      | Low      | Low  | Low      | Low | Low      | Low      | Low      | Low      | Low      | <b>Low</b>      |
| 22 | Harnod T, 2019      | Moderate | Moderate | Moderate | Low  | Low      | Low | Low      | Low      | Low      | Low      | Low      | <b>Low</b>      |
| 23 | Liao HC, 2019       | Low      | Low      | Low      | Low  | Low      | Low | Low      | High     | Low      | Low      | Moderate | <b>Low</b>      |
| 24 | Merlino G, 2019     | Low      | Low      | Moderate | Low  | Low      | Low | Low      | Low      | High     | High     | Low      | <b>Moderate</b> |
| 25 | Scoppetulo P, 2019  | Moderate | Moderate | Low      | High | High     | Low | Low      | Moderate | Low      | Low      | High     | <b>Moderate</b> |
| 26 | Matsubara S, 2018   | Low      | Low      | Low      | Low  | Low      | Low | Moderate | High     | Low      | Low      | Low      | <b>Low</b>      |
| 27 | Shehta N, 2018      | Low      | Low      | Moderate | Low  | Low      | Low | Low      | High     | Low      | Low      | Low      | <b>Low</b>      |
| 28 | van Tuijl JH, 2018  | Low      | Low      | Moderate | Low  | Low      | Low | Low      | Low      | Low      | Low      | Low      | <b>Low</b>      |
| 29 | Alme KN, 2017       | Low      | Low      | Moderate | Low  | Low      | Low | Low      | High     | Low      | Low      | Low      | <b>Low</b>      |
| 30 | Brondani R, 2017    | Moderate | Low      | Low      | High | High     | Low | Moderate | Low      | Low      | Low      | High     | <b>Moderate</b> |
| 31 | Chen Z, 2017        | Low      | Low      | Low      | Low  | Moderate | Low | Moderate | Low      | Low      | High     | Moderate | <b>Moderate</b> |
| 32 | Claessens D, 2017   | Low      | Low      | Moderate | Low  | Low      | Low | Low      | Low      | Low      | Moderate | Low      | <b>Low</b>      |



|    |                     |          |          |          |      |          |     |          |          |      |      |          |          |
|----|---------------------|----------|----------|----------|------|----------|-----|----------|----------|------|------|----------|----------|
| 33 | Huttunen J, 2017    | Low      | Low      | Moderate | Low  | Low      | Low | Low      | Low      | Low  | Low  | Low      | Low      |
| 34 | Leung T, 2017       | Low      | Low      | Low      | Low  | Low      | Low | Low      | Low      | High | High | Moderate | Moderate |
| 35 | Xu Y, 2017          | Low      | Low      | Moderate | Low  | Low      | Low | Low      | Moderate | Low  | Low  | Low      | Low      |
| 36 | De Marchis GM, 2016 | Low      | Low      | Low      | Low  | Low      | Low | Low      | Moderate | High | High | Low      | Moderate |
| 37 | Hamidou B, 2016     | Low      | Low      | Moderate | Low  | Low      | Low | Low      | Low      | Low  | Low  | Low      | Low      |
| 38 | Zelano J, 2016      | Moderate | Low      | Low      | Low  | Low      | Low | Moderate | Low      | High | High | Low      | Moderate |
| 39 | Arntz RM, 2015      | Low      | Low      | Low      | Low  | Low      | Low | Moderate | Low      | Low  | Low  | Low      | Low      |
| 40 | Guekht A, 2015      | Low      | Low      | Moderate | Low  | Moderate | Low | Moderate | Moderate | Low  | Low  | Moderate | Moderate |
| 41 | Li Z, 2015          | Low      | Moderate | Moderate | Low  | Low      | Low | Low      | Low      | High | High | Low      | Moderate |
| 42 | Zelano J, 2015      | Moderate | Low      | Moderate | High | High     | Low | Low      | Low      | Low  | Low  | High     | Moderate |
| 43 | Aiwansoba IF, 2014  | Low      | Moderate | High     | Low  | Moderate | Low | High     | Moderate | Low  | Low  | Moderate | Moderate |
| 44 | Belcastro V, 2014   | Low      | Low      | Low      | Low  | Low      | Low | Low      | Moderate | Low  | Low  | Low      | Low      |
| 45 | Huang CW, 2014      | Low      | Moderate | Moderate | Low  | Low      | Low | Low      | Low      | Low  | Low  | Moderate | Low      |
| 46 | Madzar D, 2014      | Low      | Low      | Low      | Low  | Low      | Low | Low      | Low      | High | High | Low      | Moderate |
| 47 | Arntz RM, 2013      | Low      | Low      | Moderate | Low  | Low      | Low | Low      | Low      | Low  | Low  | Low      | Low      |
| 48 | Mullen MT, 2013     | Moderate | High     | High     | Low  | Low      | Low | Low      | High     | Low  | Low  | Low      | Moderate |
| 49 | De Reuck JL, 2012   | Low      | Low      | Low      | Low  | Low      | Low | Low      | Low      | Low  | Low  | Moderate | Low      |

|    |                      |          |          |          |      |          |     |          |          |          |          |          |                 |
|----|----------------------|----------|----------|----------|------|----------|-----|----------|----------|----------|----------|----------|-----------------|
| 50 | Jung S, 2012         | Low      | Moderate | High     | Low  | Low      | Low | Low      | Moderate | High     | High     | Low      | <b>Moderate</b> |
| 51 | Procaccianti G, 2012 | Low      | Low      | Low      | Low  | Low      | Low | Low      | High     | Low      | Low      | Moderate | <b>Low</b>      |
| 52 | Couillard P, 2012    | Moderate | Low      | Low      | High | High     | Low | Low      | High     | Low      | Low      | High     | <b>Moderate</b> |
| 53 | Beghi E, 2011        | Low      | Low      | Low      | Low  | Low      | Low | Low      | High     | Low      | Low      | Low      | <b>Low</b>      |
| 54 | De Herdt V, 2011     | Low      | Low      | Low      | Low  | Low      | Low | Low      | Moderate | High     | High     | Low      | <b>Moderate</b> |
| 55 | Burneo JG, 2010      | Moderate | Low      | Moderate | Low  | Low      | Low | Low      | Low      | Low      | Low      | Moderate | <b>Low</b>      |
| 56 | Panitchote A, 2010   | Low      | High     | High     | High | High     | Low | Low      | Low      | Moderate | High     | High     | <b>High</b>     |
| 57 | Selim HA, 2009       | Low      | Low      | Moderate | Low  | Moderate | Low | Low      | Low      | High     | High     | Moderate | <b>Moderate</b> |
| 58 | Ahangar AA, 2008     | Low      | Low      | Moderate | High | High     | Low | Low      | Low      | Low      | Low      | High     | <b>Moderate</b> |
| 59 | Lin YJ, 2008         | Low      | Low      | Moderate | High | High     | Low | Low      | Low      | Low      | Low      | Moderate | <b>Moderate</b> |
| 60 | Szaflarski JP, 2008  | Low      | Moderate | Moderate | Low  | Low      | Low | Low      | Moderate | Low      | Low      | Moderate | <b>Moderate</b> |
| 61 | Bateman BT, 2007     | Low      | Moderate | High     | Low  | Low      | Low | Moderate | High     | Low      | Low      | Low      | <b>Moderate</b> |
| 62 | De Reuck J, 2006     | Low      | Low      | Low      | High | High     | Low | Low      | Low      | Low      | Low      | High     | <b>Moderate</b> |
| 63 | Knake S, 2006        | Low      | Moderate | Moderate | Low  | Low      | Low | Moderate | Low      | High     | Moderate | Low      | <b>Moderate</b> |
| 64 | Lossius MI, 2005     | Low      | Low      | Moderate | Low  | Low      | Low | Low      | Low      | Low      | Low      | Low      | <b>Low</b>      |
| 65 | Devuyst G, 2003      | Moderate | Low      | Moderate | Low  | Low      | Low | Moderate | High     | Low      | Low      | Moderate | <b>Moderate</b> |
| 66 | Labovitz DL, 2001    | Low      | Low      | Moderate | Low  | Low      | Low | Moderate | Moderate | Low      | Low      | Low      | <b>Low</b>      |
| 67 | Bladin CF, 2000      | Low      | Low      | Moderate | Low  | Low      | Low | Low      | Low      | High     | High     | Low      | <b>Moderate</b> |

|    |                  |          |      |          |      |      |     |          |      |     |      |      |                 |
|----|------------------|----------|------|----------|------|------|-----|----------|------|-----|------|------|-----------------|
| 68 | Arboix A, 1997   | Low      | Low  | Low      | Low  | Low  | Low | Moderate | High | Low | Low  | Low  | <b>Low</b>      |
| 69 | So EL, 1996      | Moderate | Low  | Low      | Low  | Low  | Low | Low      | Low  | Low | High | Low  | <b>Low</b>      |
| 70 | Shinton RA, 1988 | Moderate | Low  | Moderate | High | High | Low | Moderate | Low  | Low | Low  | High | <b>Moderate</b> |
| 71 | Davalos A, 1988  | Low      | High | High     | Low  | Low  | Low | Low      | High | Low | Low  | High | <b>Moderate</b> |

**Key:** Item 1- two groups similar and recruited from the same population; Item 2- exposures measured similarly to assign people to both exposed and unexposed groups; Item 3- exposure measured in a valid and reliable way; Item 4- confounding factors identified; Item 5- strategies to deal with confounding factors stated; Item 6- groups/participants free of the outcome at the start of the study; Item 7- outcomes measured in a valid and reliable way; Item 8- follow up time reported and sufficient to be long enough for outcomes to occur; Item 9- follow up complete, and if not, were the reasons to loss to follow up described and explored; Item 10- strategies to address incomplete follow up utilized; Item 11- appropriate statistical analysis used.

**eTable 5:** Association of disability (mean mRS score) with post-stroke seizures

| S. No                    | Outcome measures                                          | Cases | Controls | No. of studies | SMD (95% CI)               | I <sup>2</sup> |
|--------------------------|-----------------------------------------------------------|-------|----------|----------------|----------------------------|----------------|
| <b>Main analysis</b>     |                                                           |       |          |                |                            |                |
| 1                        | <b>Primary analysis</b>                                   |       |          |                |                            |                |
|                          | PSS vs. no PSS                                            | 1001  | 21850    | 10             | <b>0.57 (0.43 to 0.72)</b> | 71%            |
| 2                        | <b>Limit analysis by adjusting for small study effect</b> |       |          |                |                            |                |
|                          | PSS vs. no PSS (adjusted odds)                            | 1001  | 21850    | 10             | <b>0.49 (0.24 to 0.74)</b> | 71%            |
| <b>Subgroup analyses</b> |                                                           |       |          |                |                            |                |
| 3                        | <b>Seizure types</b>                                      |       |          |                |                            |                |
|                          | Early PSS vs. no PSS                                      | 268   | 13595    | 3              | <b>0.75 (0.13 to 1.37)</b> | 82%            |
|                          | Late PSS vs. no PSS                                       | 341   | 1363     | 3              | <b>0.56 (0.02 to 1.10)</b> | 56%            |
| 4                        | <b>Risk of bias</b>                                       |       |          |                |                            |                |
|                          | Low (PSS vs. no PSS)                                      | 447   | 17794    | 5              | <b>0.57 (0.21 to 0.92)</b> | 76%            |
|                          | Moderate (PSS vs. no PSS)                                 | 509   | 3092     | 4              | <b>0.47 (0.20 to 0.74)</b> | 50%            |
|                          | High (PSS vs. no PSS)                                     | 45    | 964      | 1              | <b>0.57 (0.40 to 0.75)</b> | -              |
| 5                        | <b>Stroke subtypes</b>                                    |       |          |                |                            |                |
|                          | PISS vs. no PSS                                           | 599   | 15278    | 6              | <b>0.59 (0.38 to 0.80)</b> | 75%            |
|                          | PHSS vs. no PHSS                                          | 48    | 445      | 2              | 0.12 (-0.82 to 1.06)       | 90%            |

**Bold values:** p<0.05.

No ICD code-based studies were eligible for this analysis.

**Abbreviations:** SMD- Standardized Mean Difference; CI- Confidence Interval; PSS- Post Stroke Seizures; PISS- Post Ischemic Stroke Seizures; PHSS- Post Hemorrhagic Stroke Seizures.

**eTable 6:** Association of recurrent stroke and dementia with post-stroke seizures

| S. No                    | Outcome measures        | Cases    | Controls   | No. of studies | OR (95% CI)                 | I <sup>2</sup> |
|--------------------------|-------------------------|----------|------------|----------------|-----------------------------|----------------|
| <b>Recurrent Stroke</b>  |                         |          |            |                |                             |                |
| <b>Main analysis</b>     |                         |          |            |                |                             |                |
| 1                        | <b>Primary analysis</b> |          |            |                |                             |                |
|                          | PSS vs. no PSS          | 172/ 636 | 1429/ 8274 | 5              | 1.32 (0.59 to 2.96)         | 82%            |
| <b>Subgroup analysis</b> |                         |          |            |                |                             |                |
| 2                        | <b>ICD codes</b>        |          |            |                |                             |                |
|                          | No ICD codes            | 20/ 150  | 193/ 1182  | 3              | 0.82 (0.06 to 12.04)        | 82%            |
|                          | ICD codes               | 152/ 486 | 1236/ 7092 | 2              | 2.21 (0.65 to 7.54)         | 0%             |
| <b>Dementia</b>          |                         |          |            |                |                             |                |
| <b>Main analysis</b>     |                         |          |            |                |                             |                |
| 1                        | <b>Primary analysis</b> |          |            |                |                             |                |
|                          | PSS vs. no PSS          | 50/ 1582 | 279/ 22164 | 2              | <b>3.11 (1.25 to 7.72)</b>  | 43%            |
| <b>Subgroup analysis</b> |                         |          |            |                |                             |                |
| 2                        | <b>ICD codes</b>        |          |            |                |                             |                |
|                          | No ICD codes            | 5/ 8     | 11/ 58     | 1              | <b>7.12 (1.47 to 34.39)</b> | -              |
|                          | ICD codes               | 45/ 1574 | 268/ 22106 | 1              | <b>2.40 (1.74 to 3.30)</b>  | -              |

**Bold values:** p<0.05.

**Abbreviations:** OR- Odds Ratio; CI- Confidence Interval; PSS- Post Stroke Seizures; ICD- International Classification of Disease.

**eTable 7:** A comparison of our meta-analysis with previously published meta-analyses on the association of post-stroke seizures with mortality

| <b>Meta-analysis</b>                 | <b>Ren <i>et al.</i> (2022)<sup>1</sup></b> | <b>Lin <i>et al.</i> (2022)<sup>2</sup></b>                        | <b>Misra <i>et al.</i> (Present study)</b>                                                                   |                                                                                               |
|--------------------------------------|---------------------------------------------|--------------------------------------------------------------------|--------------------------------------------------------------------------------------------------------------|-----------------------------------------------------------------------------------------------|
| <b>No. of studies</b>                | 10                                          | 13                                                                 | 71                                                                                                           |                                                                                               |
| <b>Outcomes assessed (N=studies)</b> | Mortality (N=10)                            | Mortality (N=11)                                                   | Mortality (N=57), poor functional outcome (N=22), disability (N=10), recurrent stroke, (N=5), dementia (N=2) |                                                                                               |
| <b>Seizure types included</b>        | Late-onset seizures                         | Early and late-onset seizures                                      | Early and late-onset seizures                                                                                |                                                                                               |
| <b>Stroke subtypes included</b>      | Ischemic and hemorrhagic stroke             | Hemorrhagic stroke                                                 | Ischemic and hemorrhagic stroke                                                                              |                                                                                               |
| <b>Pooled analysis</b>               | Pooled adjusted estimates                   | Pooled crude and adjusted estimates                                | Pooled raw data                                                                                              |                                                                                               |
| <b>Association with Mortality</b>    | Late seizures associated with mortality.    | No association of seizures post hemorrhagic stroke with mortality. | PSS associated with mortality. In subgroup, early but not late seizures were associated with mortality.      | Seizures after both stroke subtypes (ischemic and hemorrhagic) are associated with mortality. |

**eTable 8:** Future directions for PSS studies

| <b>S. No</b> | <b>Challenges in PSS research</b>                                                | <b>Future directions</b>                                                                                                                                                            |
|--------------|----------------------------------------------------------------------------------|-------------------------------------------------------------------------------------------------------------------------------------------------------------------------------------|
| 1.           | Disparate definitions for early- and late-onset seizures post-stroke.            | Use ILAE's updated definition for post-stroke epilepsy and seizure classification.                                                                                                  |
| 2.           | Lack of segregated outcome data on seizure subtypes and stroke subtypes.         | Early and late seizures, and ischemic and hemorrhagic stroke are very different phenomena and must be reported separately in future studies.                                        |
| 3.           | Variable length of follow-up from hospital discharge to 26 years.                | We propose at least 2 years, preferably 3 years, post-stroke follow-up in PSS research.                                                                                             |
| 4.           | Lack of data on epilepsy and cognitive outcome measures.                         | Report clinical, functional, patient-reported outcomes, cognitive, and epilepsy outcomes (e.g., seizure frequency, seizure control, seizure severity).                              |
| 5.           | Inconsistent reporting of NIH stroke scale.                                      | Consistently report the age, stroke severity, and time of outcome assessment.                                                                                                       |
| 6.           | Lack of reporting standards in observational studies.                            | Report their results in accordance with Strengthening the Reporting of Observational Studies in Epidemiology (STROBE) guidelines.                                                   |
| 7.           | PSS research based on ICD codes is prone to misclassification.                   | Institution-level regular audit of the ICD coding to ensure credibility of the ICD code-based research.                                                                             |
| 8.           | Use of disparate methodology and lack of adequately powered prospective studies. | Collaborative efforts like prospective multicentric studies and individual patient data analyses to further PSS research; use predefined common data elements and patient outcomes. |

## eReferences

1. Ren Z, Wen Q, Yan X, Wang Y, Zhang Y. Post-stroke epilepsy and risk of all-cause mortality: A systematic review and meta-analysis of cohort studies. *Clin Neurol Neurosurg*. 2022;220:107362. doi: 10.1016/j.clineuro.2022.107362
2. Lin HY, Wei QQ, Huang JY, Pan XH, Liang NC, Huang CX, Long T, Gao W, Shi SL. Relationship Between Mortality and Seizures After Intracerebral Hemorrhage: A Systematic Review and Meta-Analysis. *Front Neurol*. 2022;13:922677. doi: 10.3389/fneur.2022.922677
