# Supplementary material
Source: PubMed Central journal article supplement (PMC10507596)
Supplement: jamaneurol-e233240-s002.pdf [file jamaneurol-e233240-s002.pdf]

## Data Sharing Statement

Misra. Outcomes in Patients With Poststroke Seizures. *JAMA Neurol*. Published September 18, 2023. doi:10.1001/jamaneurol.2023.3240

### Data

**Data available:** Yes

**Data types:** Other (please specify)

**Additional Information:** Data extracted from studies included in the meta-analysis.

**How to access data:** Data are available on reasonable request from the corresponding author ([nishant.mishra@yale.edu](mailto:nishant.mishra@yale.edu)).

**When available:** With publication

### Supporting Documents

**Document types:** None

### Additional Information

**Who can access the data:** Any qualified researcher requesting for data.

**Types of analyses:** For any purpose

**Mechanisms of data availability:** with investigator support.
